# Supplementary material for: Next-generation Candida albicans recombinant Als3p and Hyr1p dual antigen vaccine for invasive Candida infections
Source: Research Square preprint supplement (doi:10.21203/rs.3.rs-7270678/v1), 2025-09-05
Supplement: Supplementary file 1 [file 6f4898c859166e11eb5a7648.docx]

**SUPPLEMENTAL DATA**

**
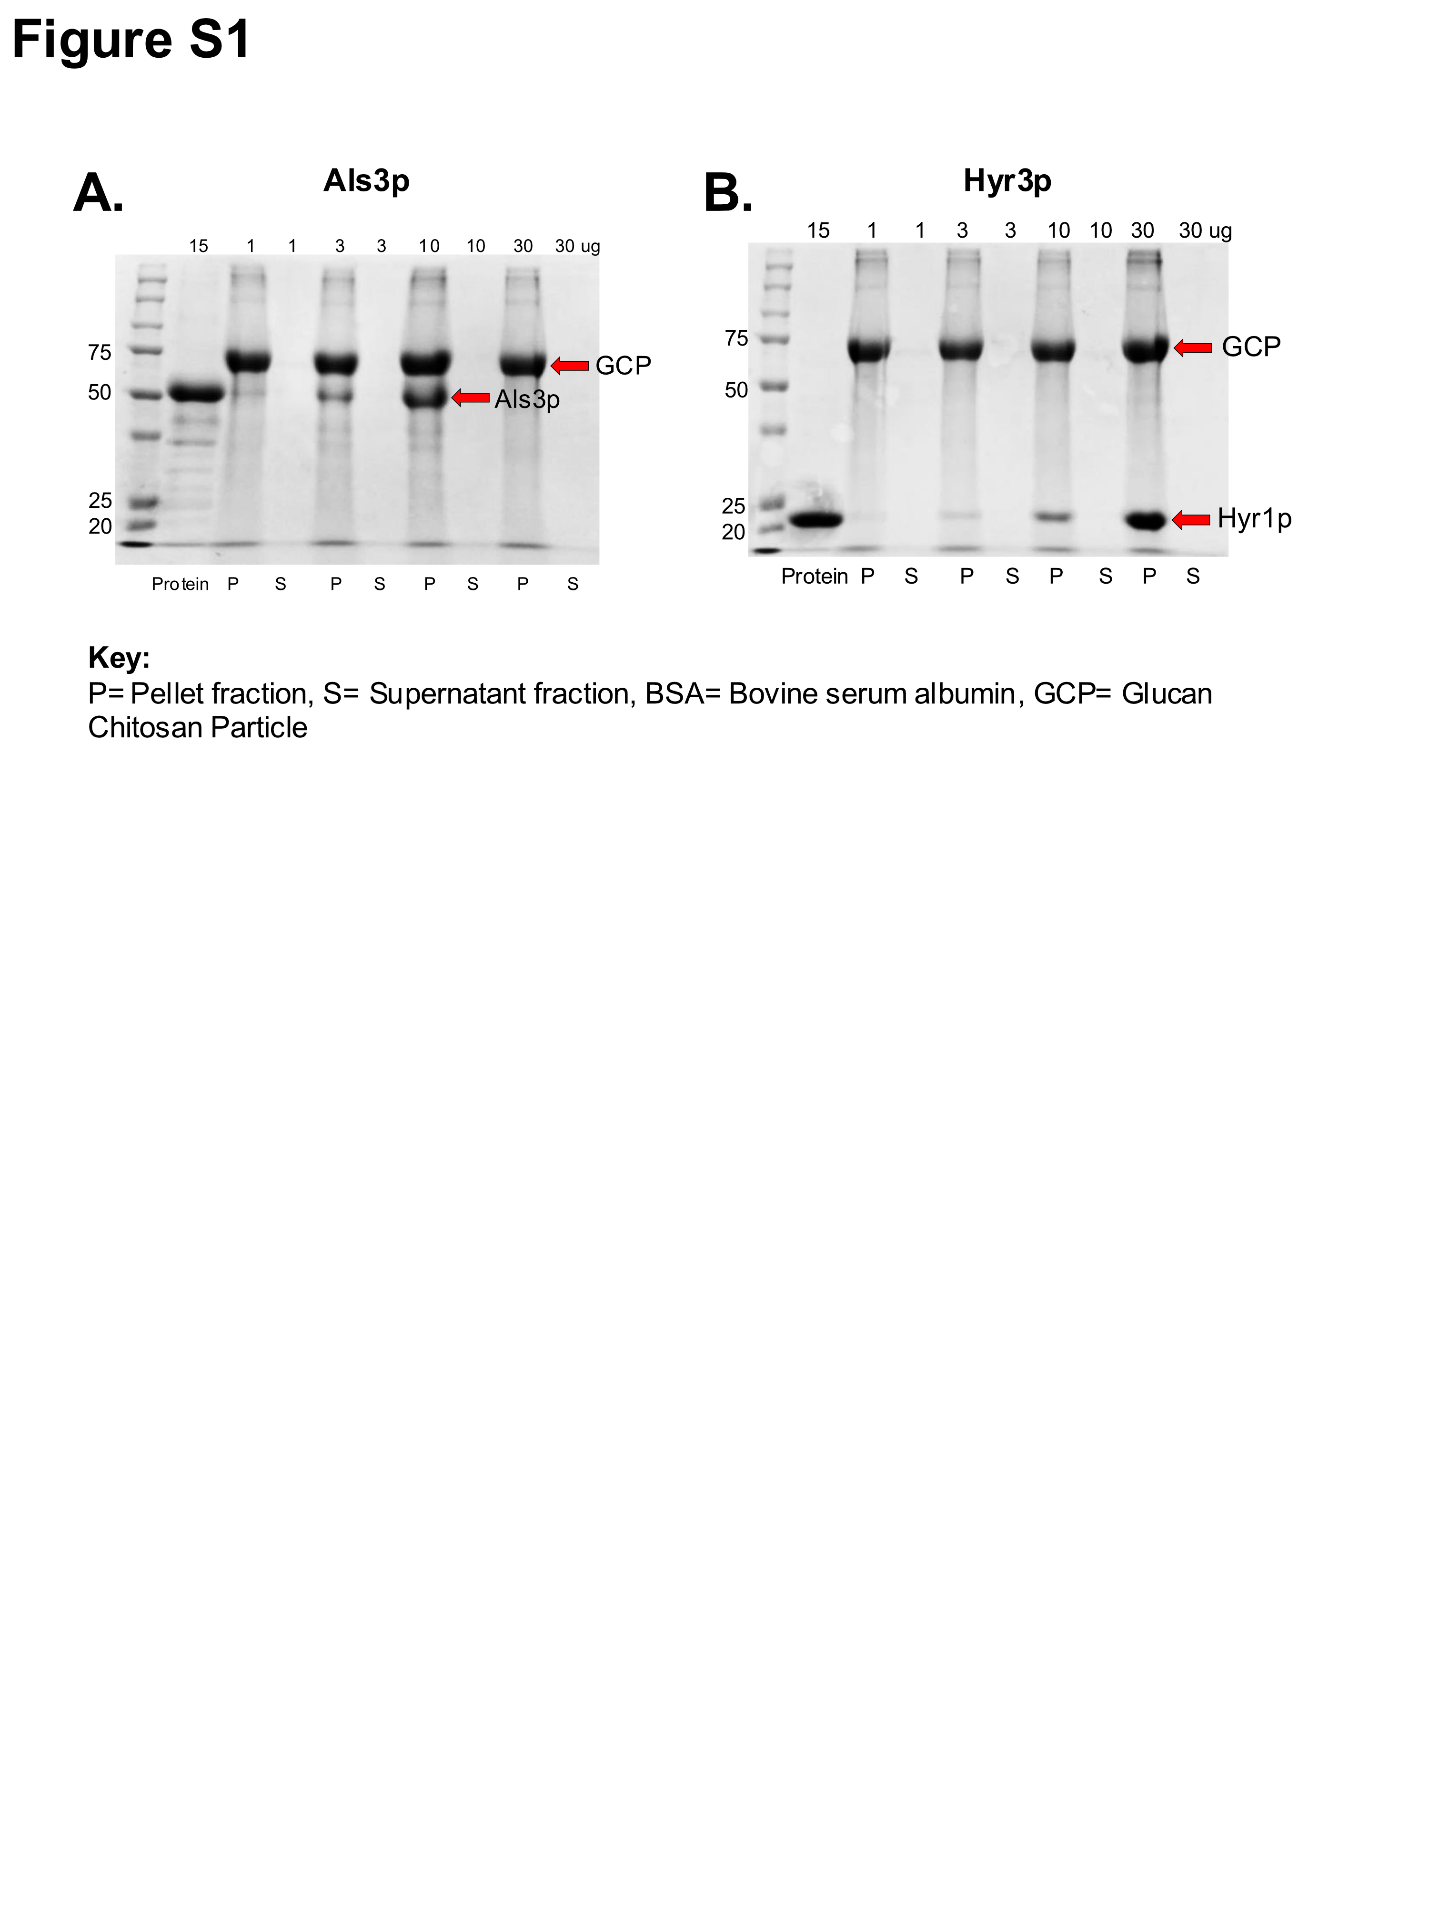
**

**Figure S1. Als3p and Hyr1p encapsulation into GCP particles.** The encapsulation of the Als3p and Hyr1p was verified by estimating protein contents in the pellet and supernatant fractions. The GCP encapsulating Als3p or Hyr1p antigen was centrifuged at 4000g for 20 minutes, and pellets and supernatant were collected and loaded on SDS-PAGE and bovine serum albumin as a loading control.

**
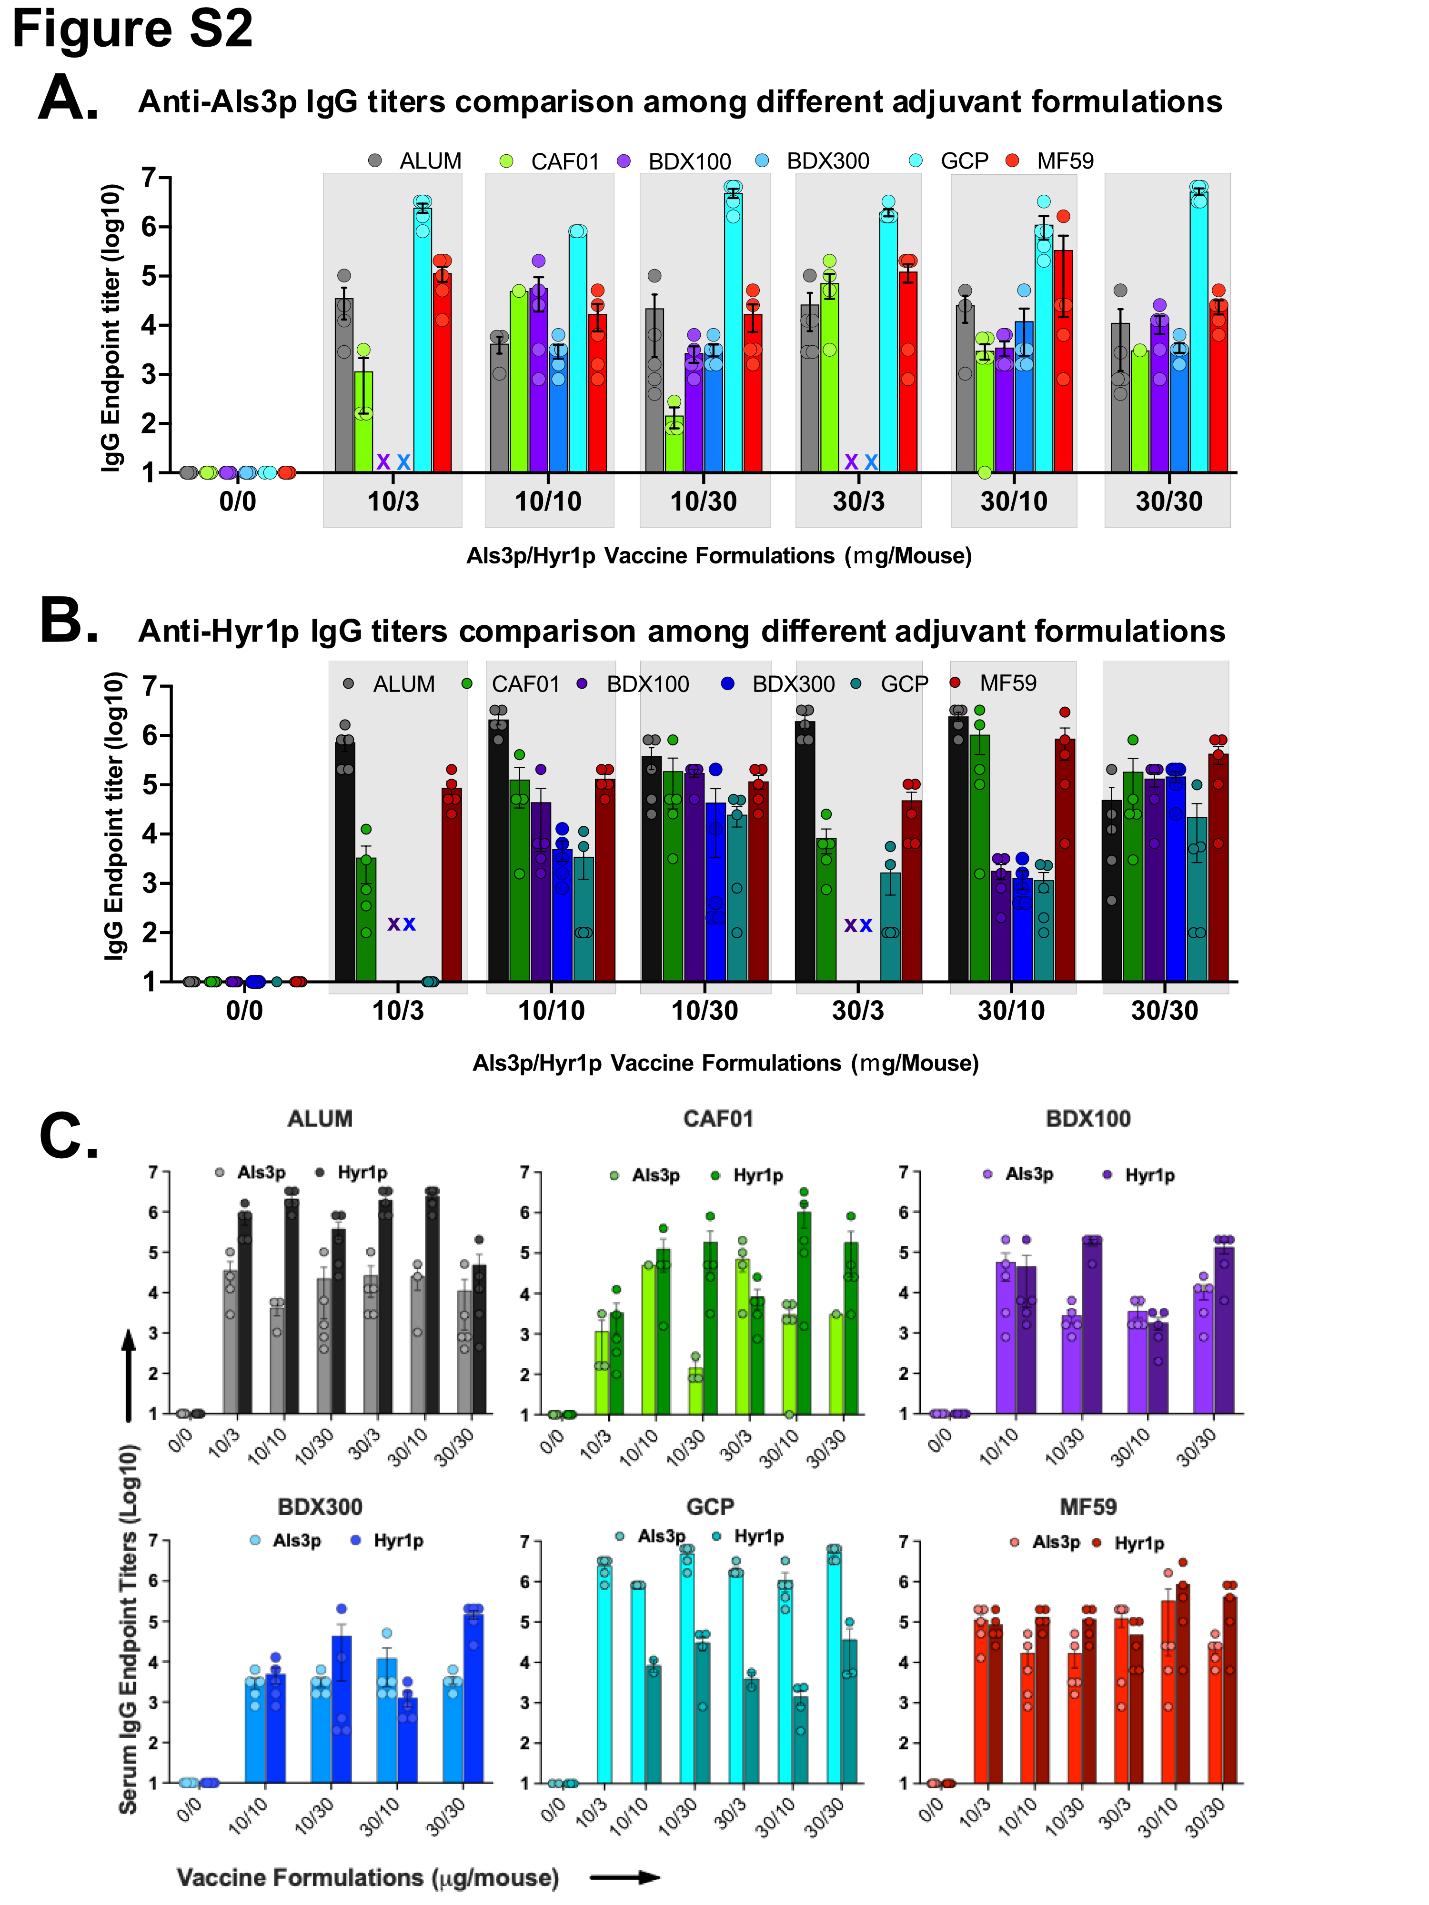
**

**Figure S2. Anti-Als3p and Hyr1p IgG endpoint titers in mice vaccinated with different adjuvant vaccine formulations.** The ICR CD-1 mice (N= 5/group) were vaccinated subcutaneously (except BDX100, which was administered intranasally) with different adjuvant vaccine formulations on days 0 and 21. Two weeks after the final vaccination, serum antigen-specific IgG titers were evaluated using ELISA. Als3 and Hyr1 antigens ratio in the vaccine formulations are represented on the x-axis. **(A).** Anti-Als3p IgG titers comparison among different adjuvant formulations; **(B).** Anti-Hyr1p IgG titers comparison among different adjuvant formulations. **(C).** Comparing serum Anti-Als3p and Anti-Hyr1p IgG endpoint titers in different adjuvant vaccine formulations.Mean endpoint titers + Standard Error is shown in the bar graph. Each data point represents a biological replicate (animal).

**
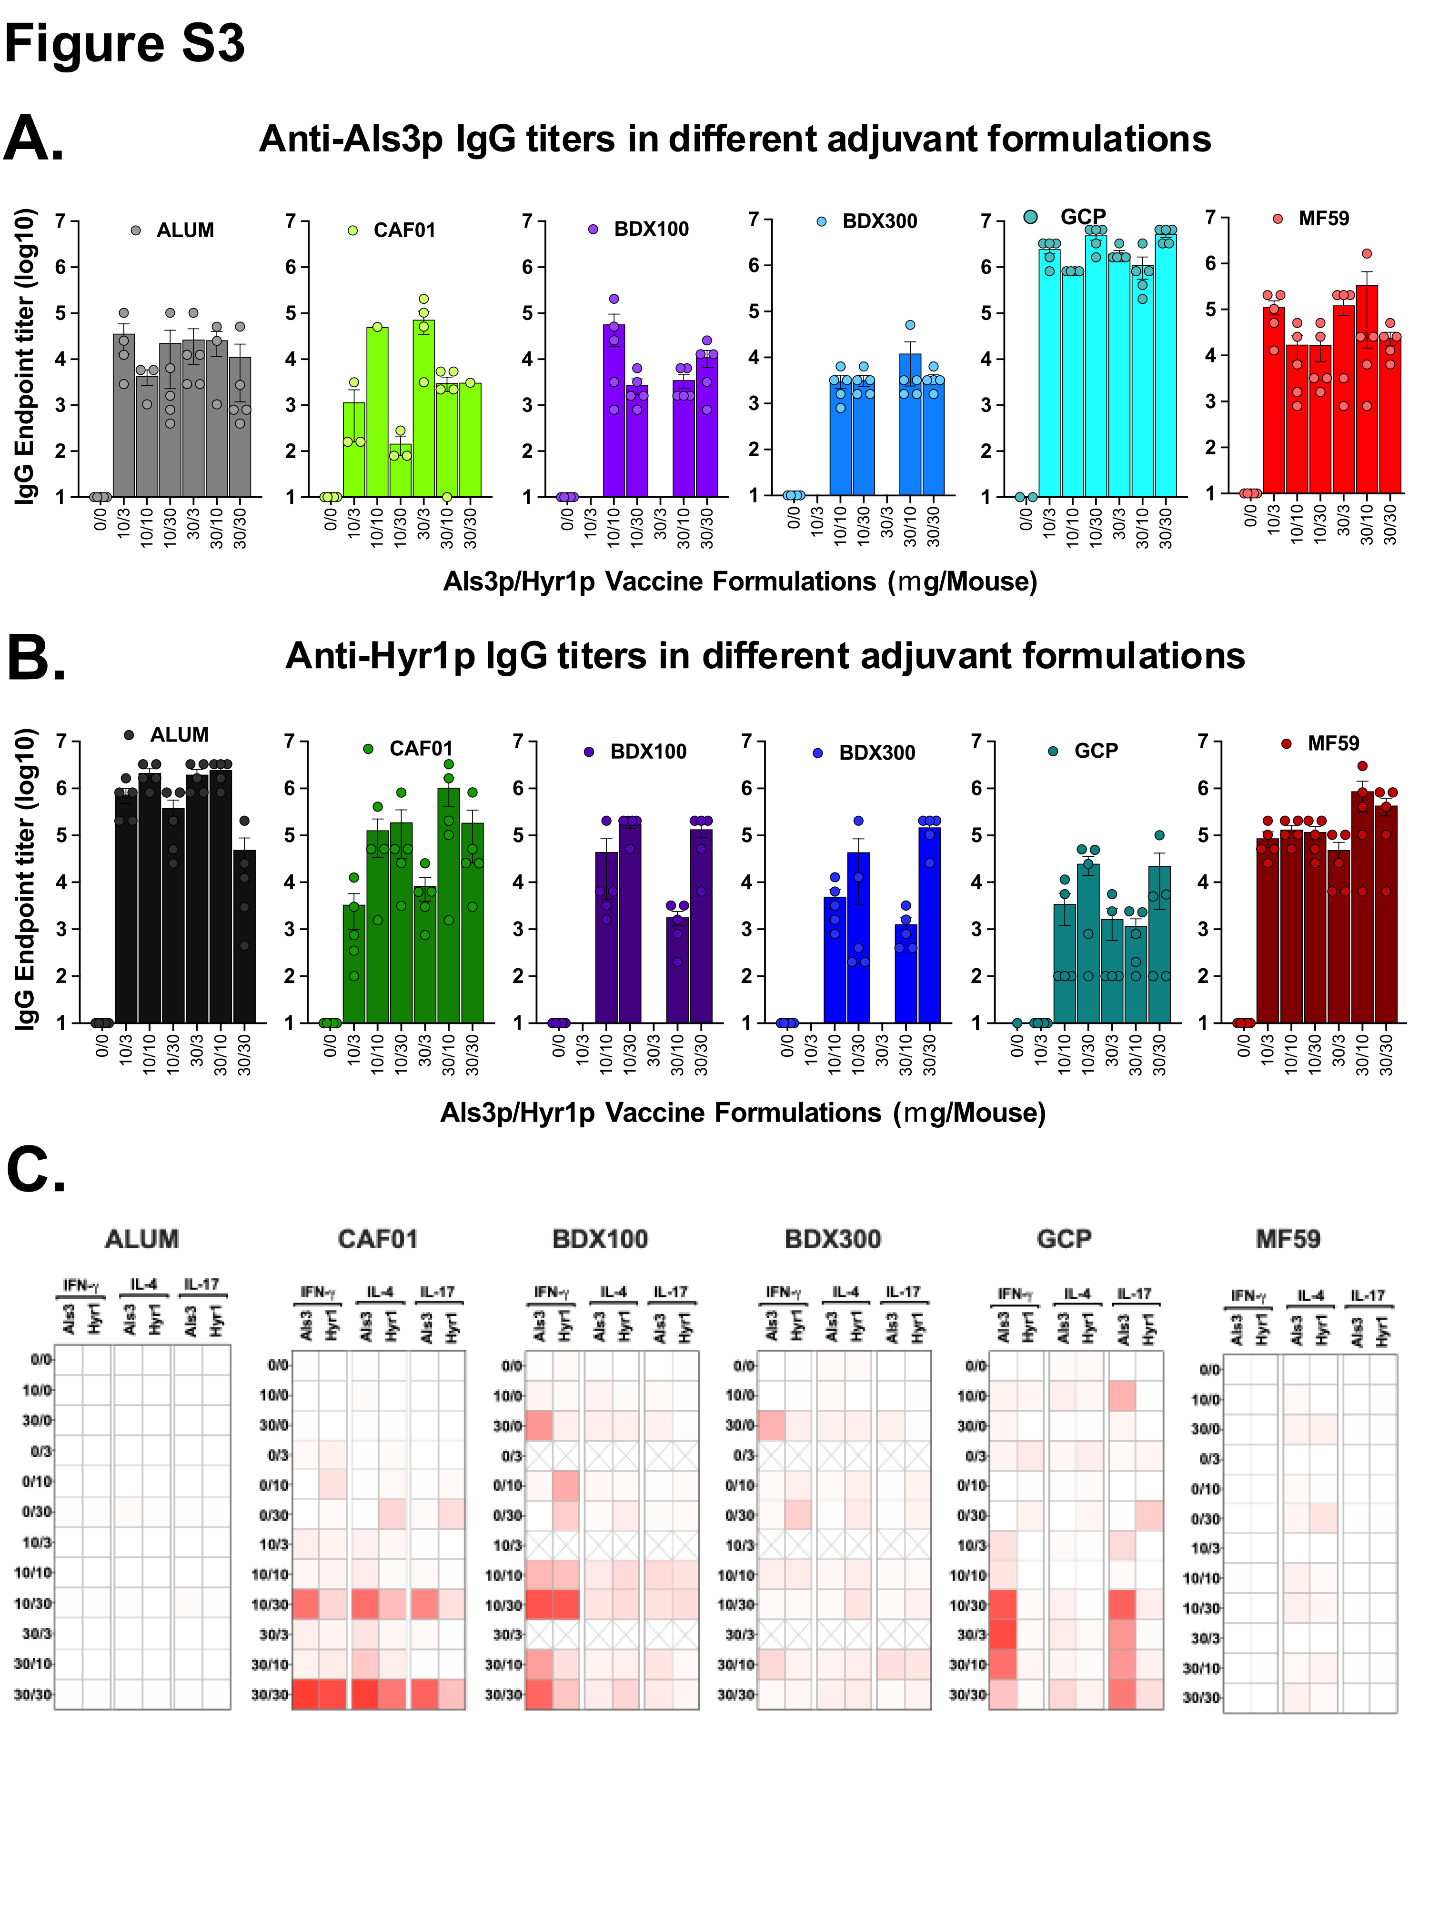
**

**Figure S3. Antigen-specific IgG endpoint titers and T cells in different adjuvant vaccine formulations.** IgG antibody and T cell responses were analyzed in mice (n= 5/group) vaccinated on days 0 and 21 with different adjuvant vaccine formulations. **(A).** Anti-Als3p IgG titers in different adjuvant formulations; **(B).** Anti-Hyr1p IgG titers in different adjuvant formulations. The antibody titers are presented in the bar graphs. Each data point represents a biological replicate (animal). **(C).** Splenocytes were stimulated with Als3p or Hyr1p antigens for 24 hours in FluroSpot plates coated with IFN-gamma, IL-4 and IL-17A capture antibodies. After the incubation, the plates were developed for FluroSpot and counted in FluroSpot reader. FluroSpot counts in unstimulated wells were subtracted from the antigen-stimulated wells (duplicate wells) and represented as mean frequency of antigen-specific Th1 (IFN-gamma), Th2 (IL-4) or Th17 (Il-17) cells in the heat maps.

**
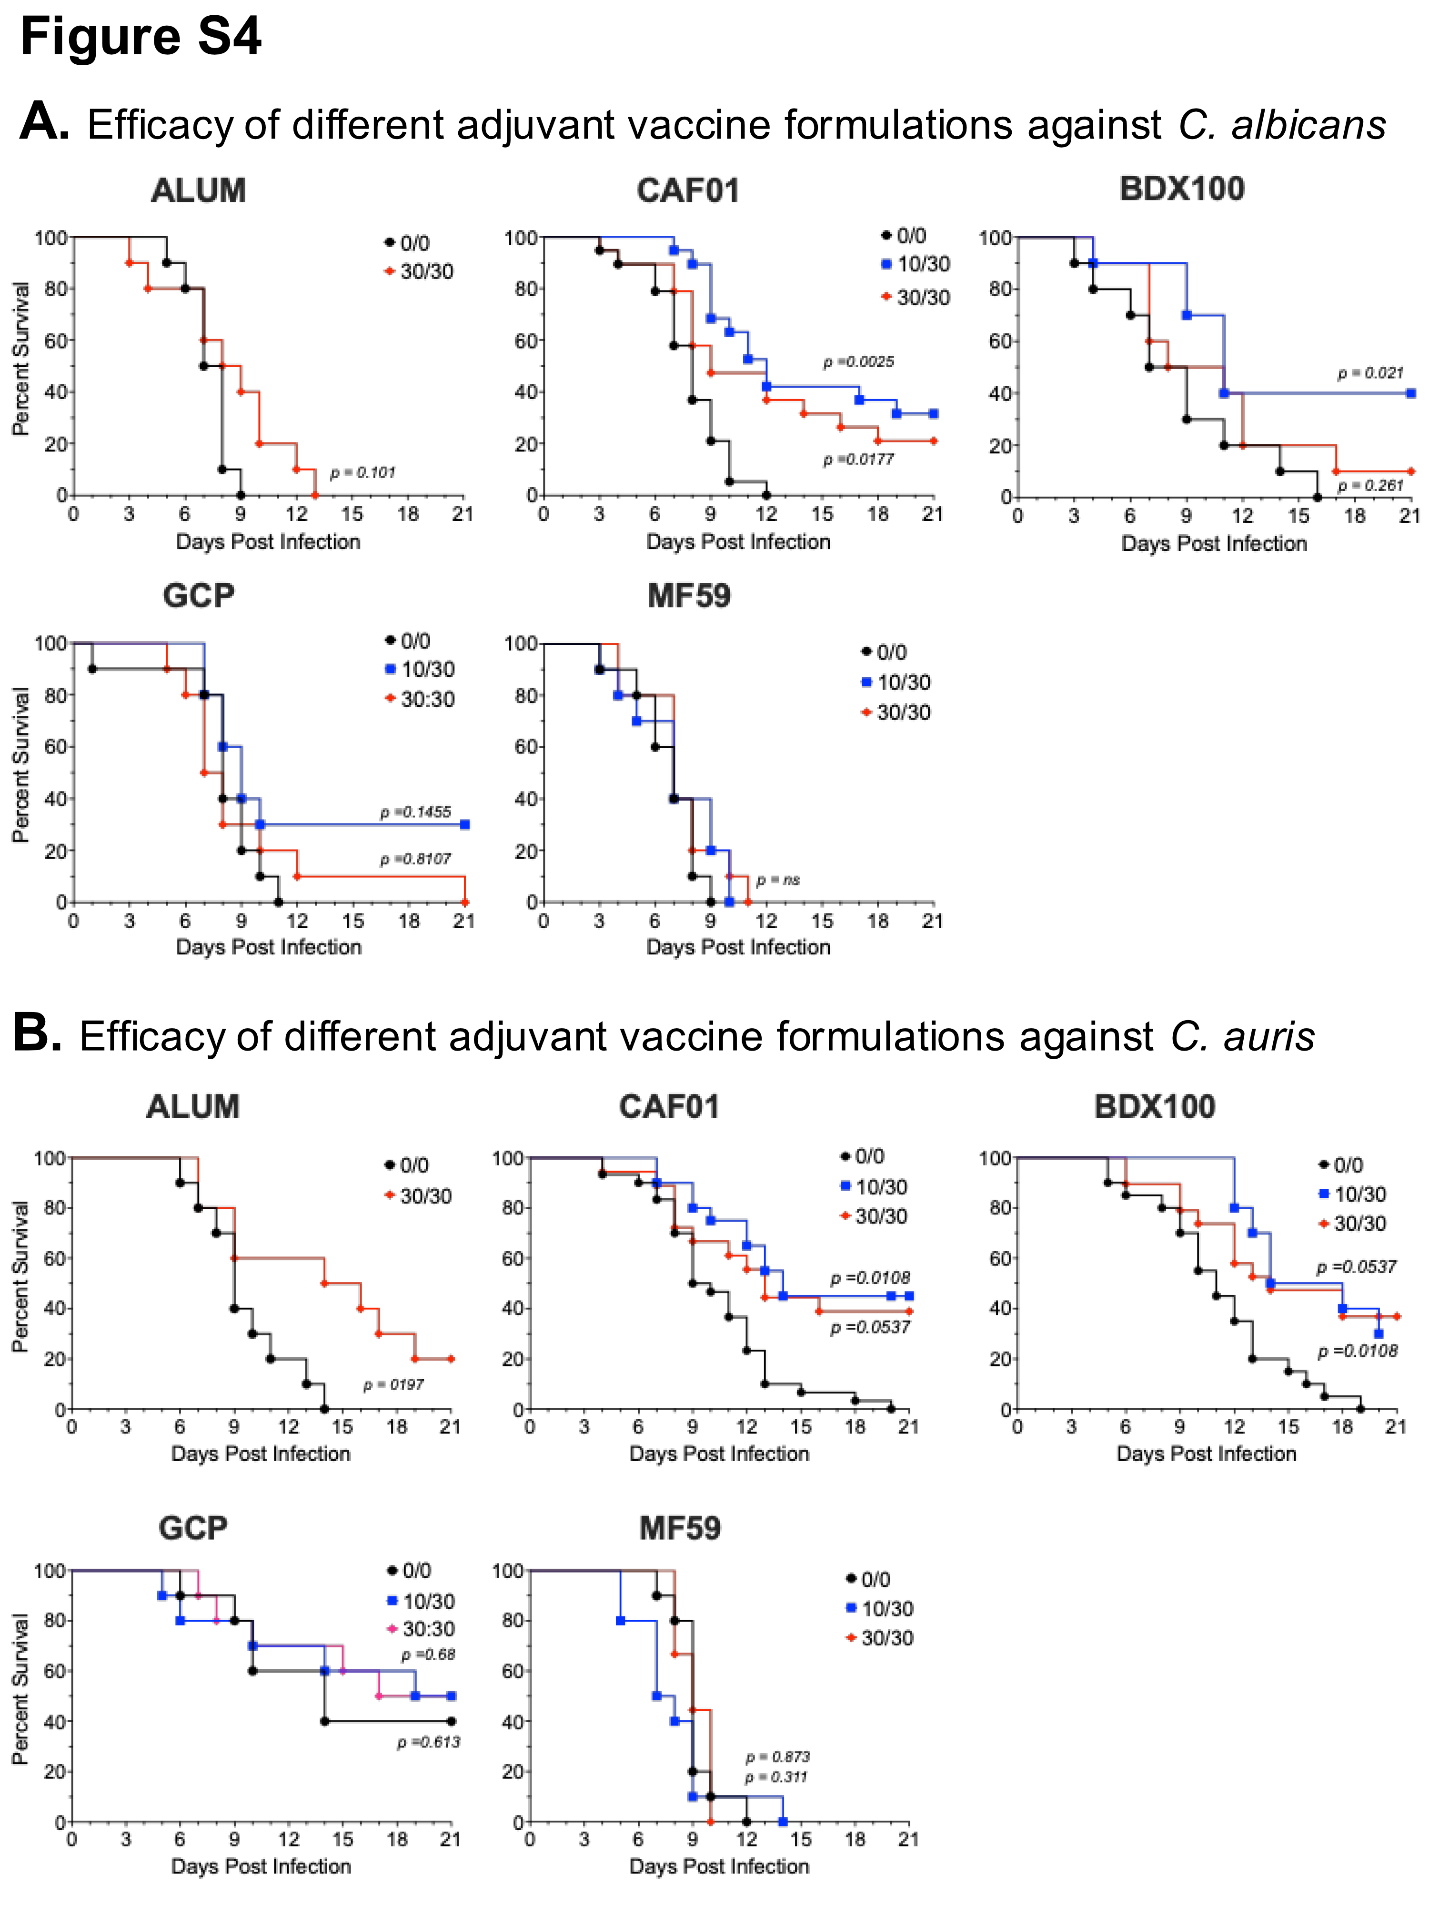
**

**Figure S4. Efficacy of different adjuvant vaccine formulations.** ICR CD-1 mice (N=10 mice/group) were vaccinated two times with Als3p/Hyr1p dual antigens at 0µg/0µg, 10µg/30µg or 30µg/30µg dose formulated with different adjuvant. Two weeks after the final vaccination, mice were infected intravenously with 2X105 cells/mouse of *C. albicans* or 5X107 cells/mouse of *C. auris*. For *C. auris* infection, the mice were immunosuppressed on day -2 relative to infection. Mice were monitored for their survival for 21 days post infection. **(A).** Efficacy against *C. albicans* infection. **(B).** Efficacy against *C. auris* infection. Mice survivals were compared by the Mantel-Cox test, and p<0.5 was considered statistically significant.

**
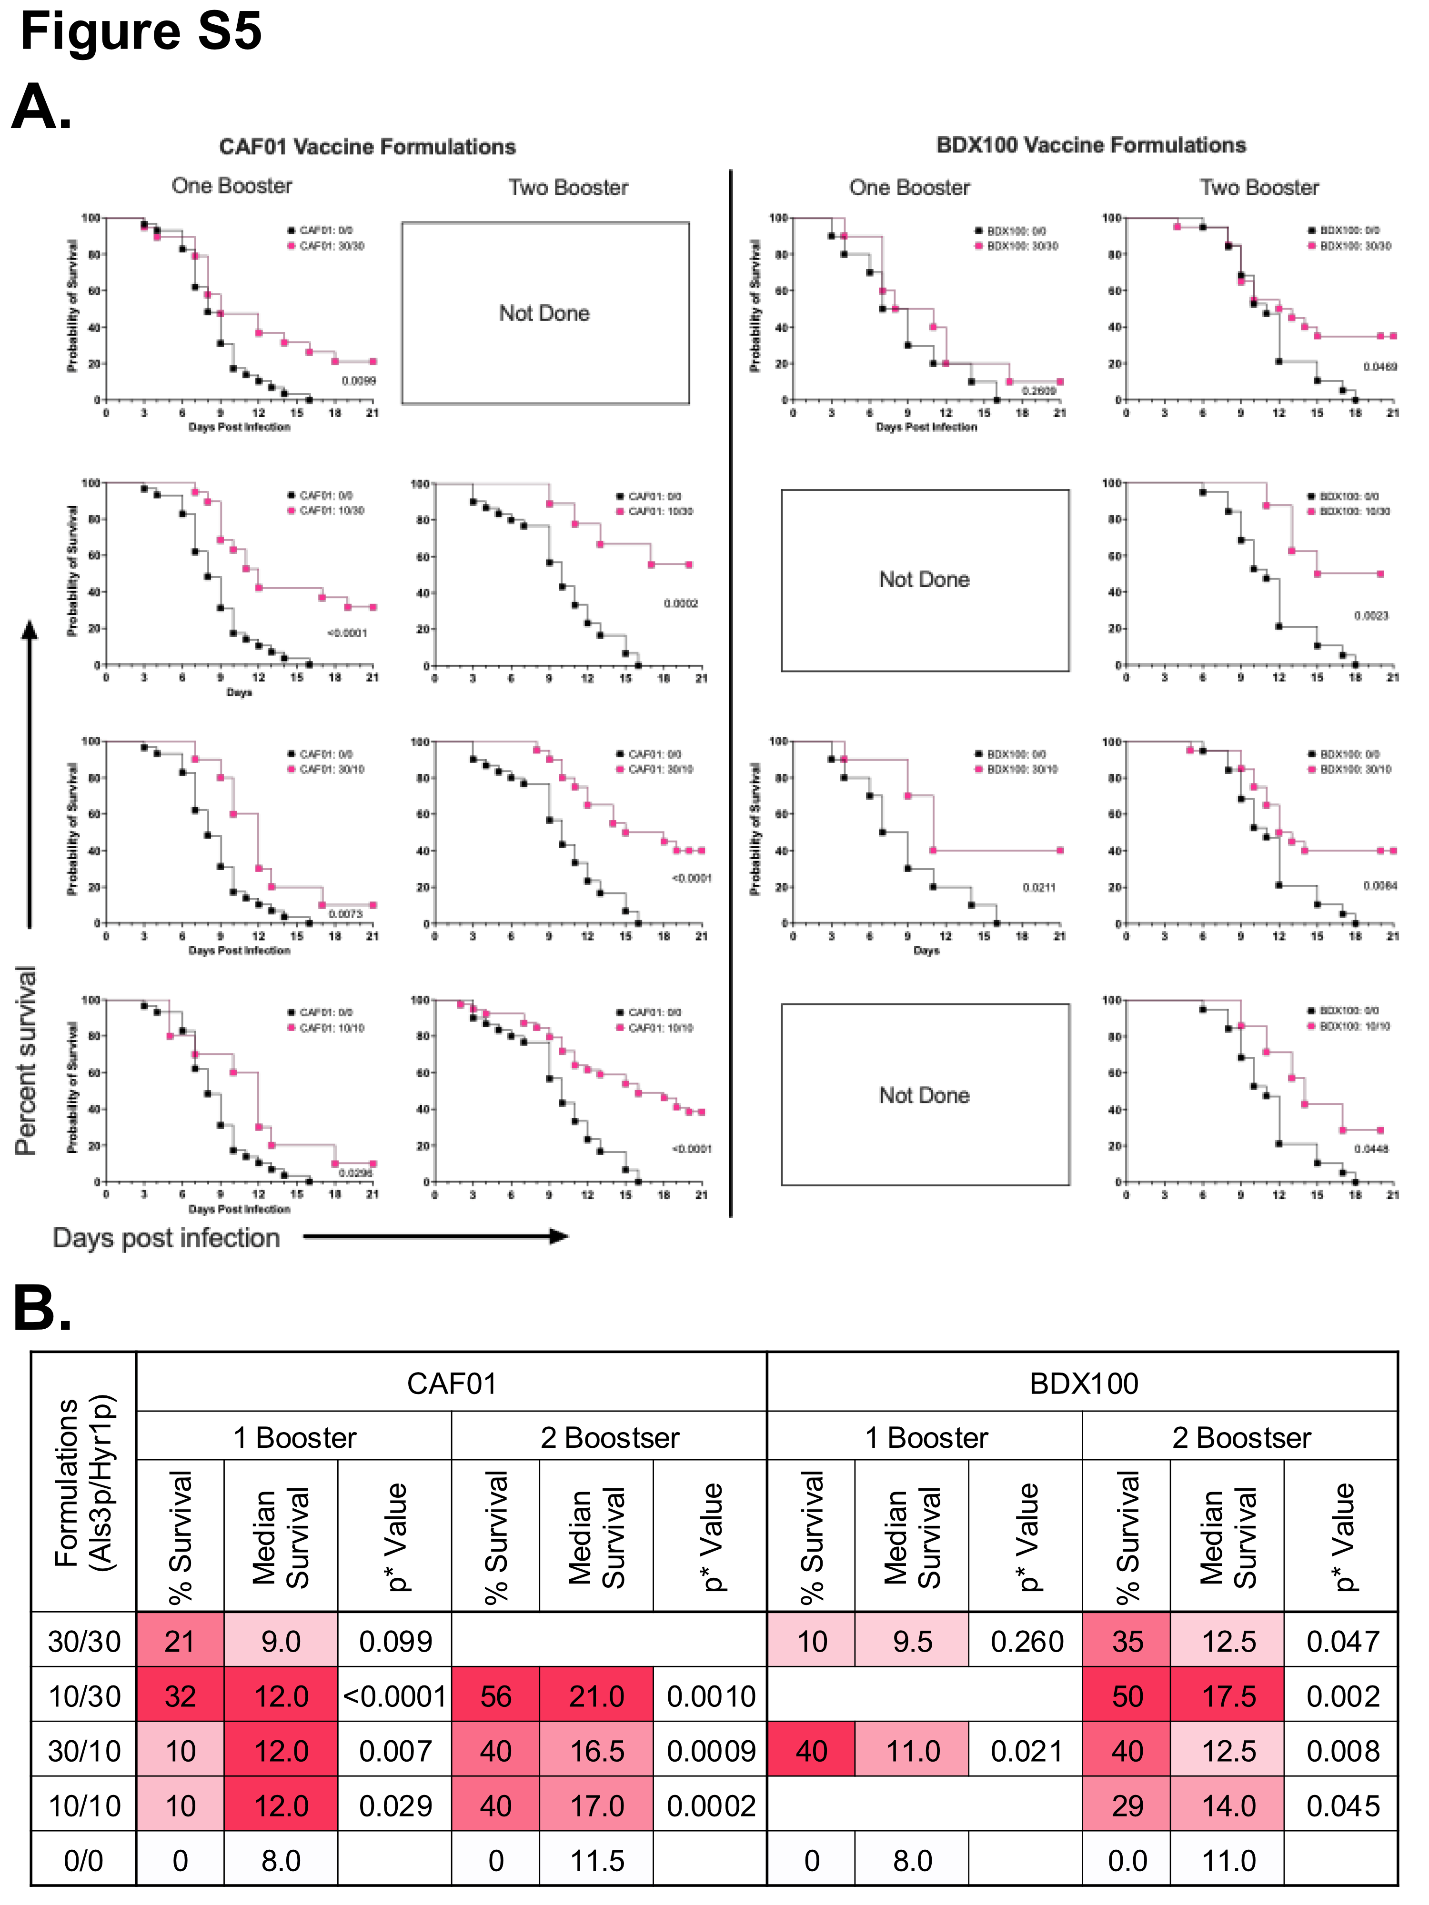
**

**Figure S5. Efficacy of CAF01 and BDX100 vaccine formulation against *C. albicans* after one and two boosters*.*** ICR CD-1 mice (N=10 mice/group) were vaccinated two (days 0, 21) or three (days 0, 21, 35) times with Als3p/Hyr1p dual antigens at 0µg/0µg, 10µg/10µg, 10µg/30µg or 30µg/10µg dose formulated with CAF01 or BDX100 adjuvant. Two weeks after the final vaccination, mice were infected intravenously with 2X105 cells/mouse inoculum of *C. albicans* andmonitored for their survival for 21 days post infection. **(A).** Survival curves were compared by the Mantel-Cox test, and p<0.5 was considered statistically significant. **(B).** Survival data, median survival time in days, and p values for the statistical comparison by the Mantel-Cox test are shown in the table.

**
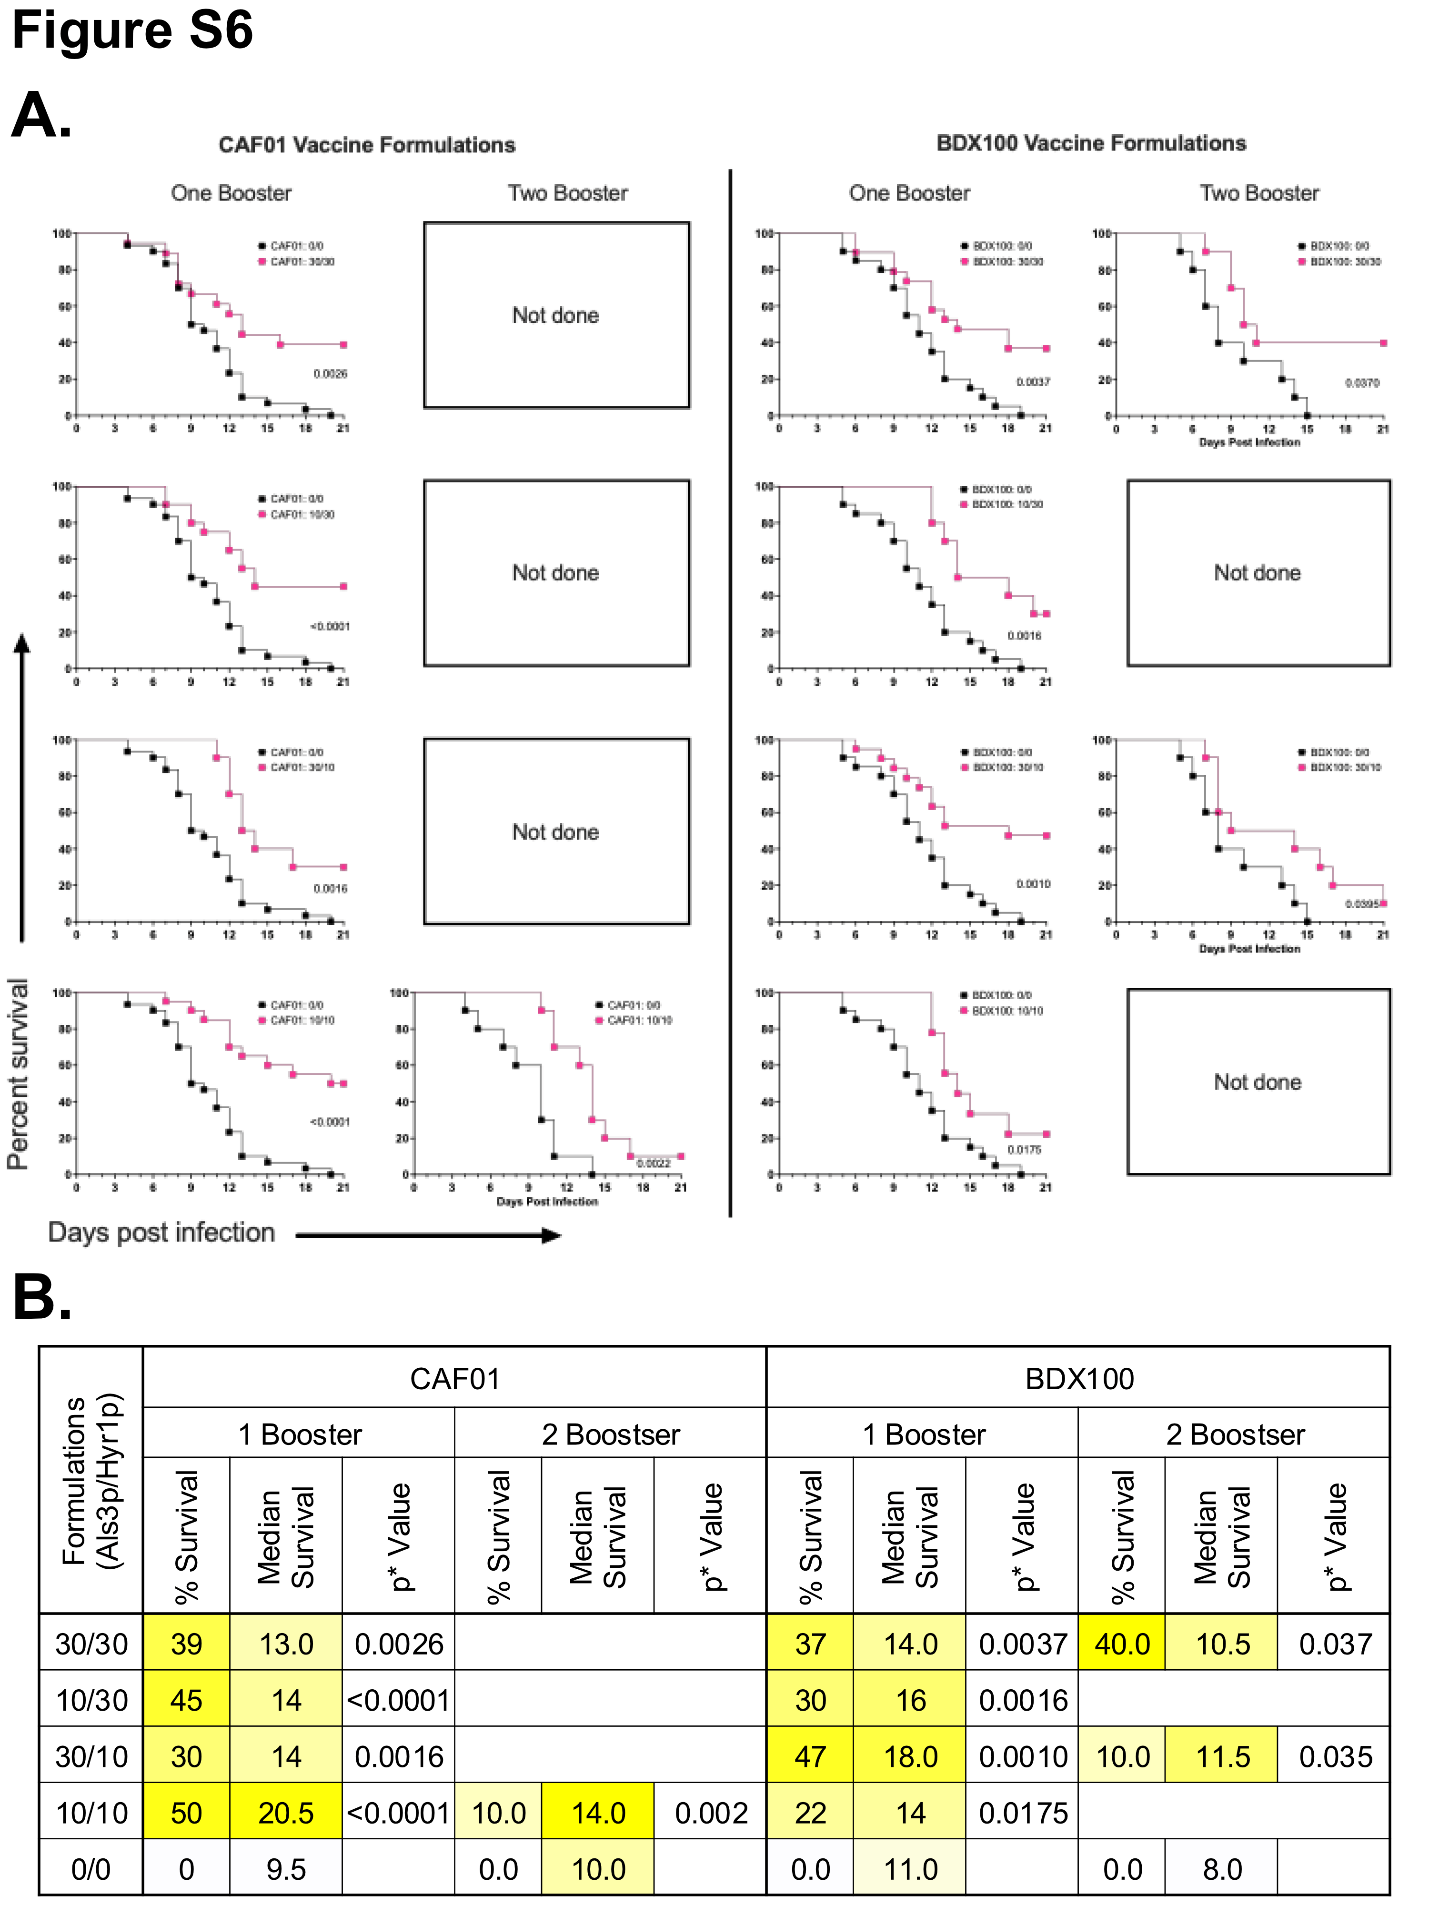
**

**Figure S6. Efficacy of CAF01 and BDX100 vaccine formulation against *C. auris* after one and two boosters*.*** ICR CD-1 mice (N=10 mice/group) were vaccinated two (days 0, 21) or three (days 0, 21, 35) times with Als3p/Hyr1p dual antigens at 0µg/0µg, 10µg/10µg, 10µg/30µg or 30µg/10µg dose formulated with CAF01 or BDX100 adjuvant. Two weeks after the final vaccination, mice were infected intravenously with 5X107 cells/mouse inoculum of *C. auris.* The mice were immunosuppressed on day -2 relative to infection. **(A).** Survival curves were compared by the Mantel-Cox test, and p<0.5 was considered statistically significant. **(B).** Survival data, median survival time in days, and p-values for the statistical comparison by the Mantel-Cox test are shown in the table.

**
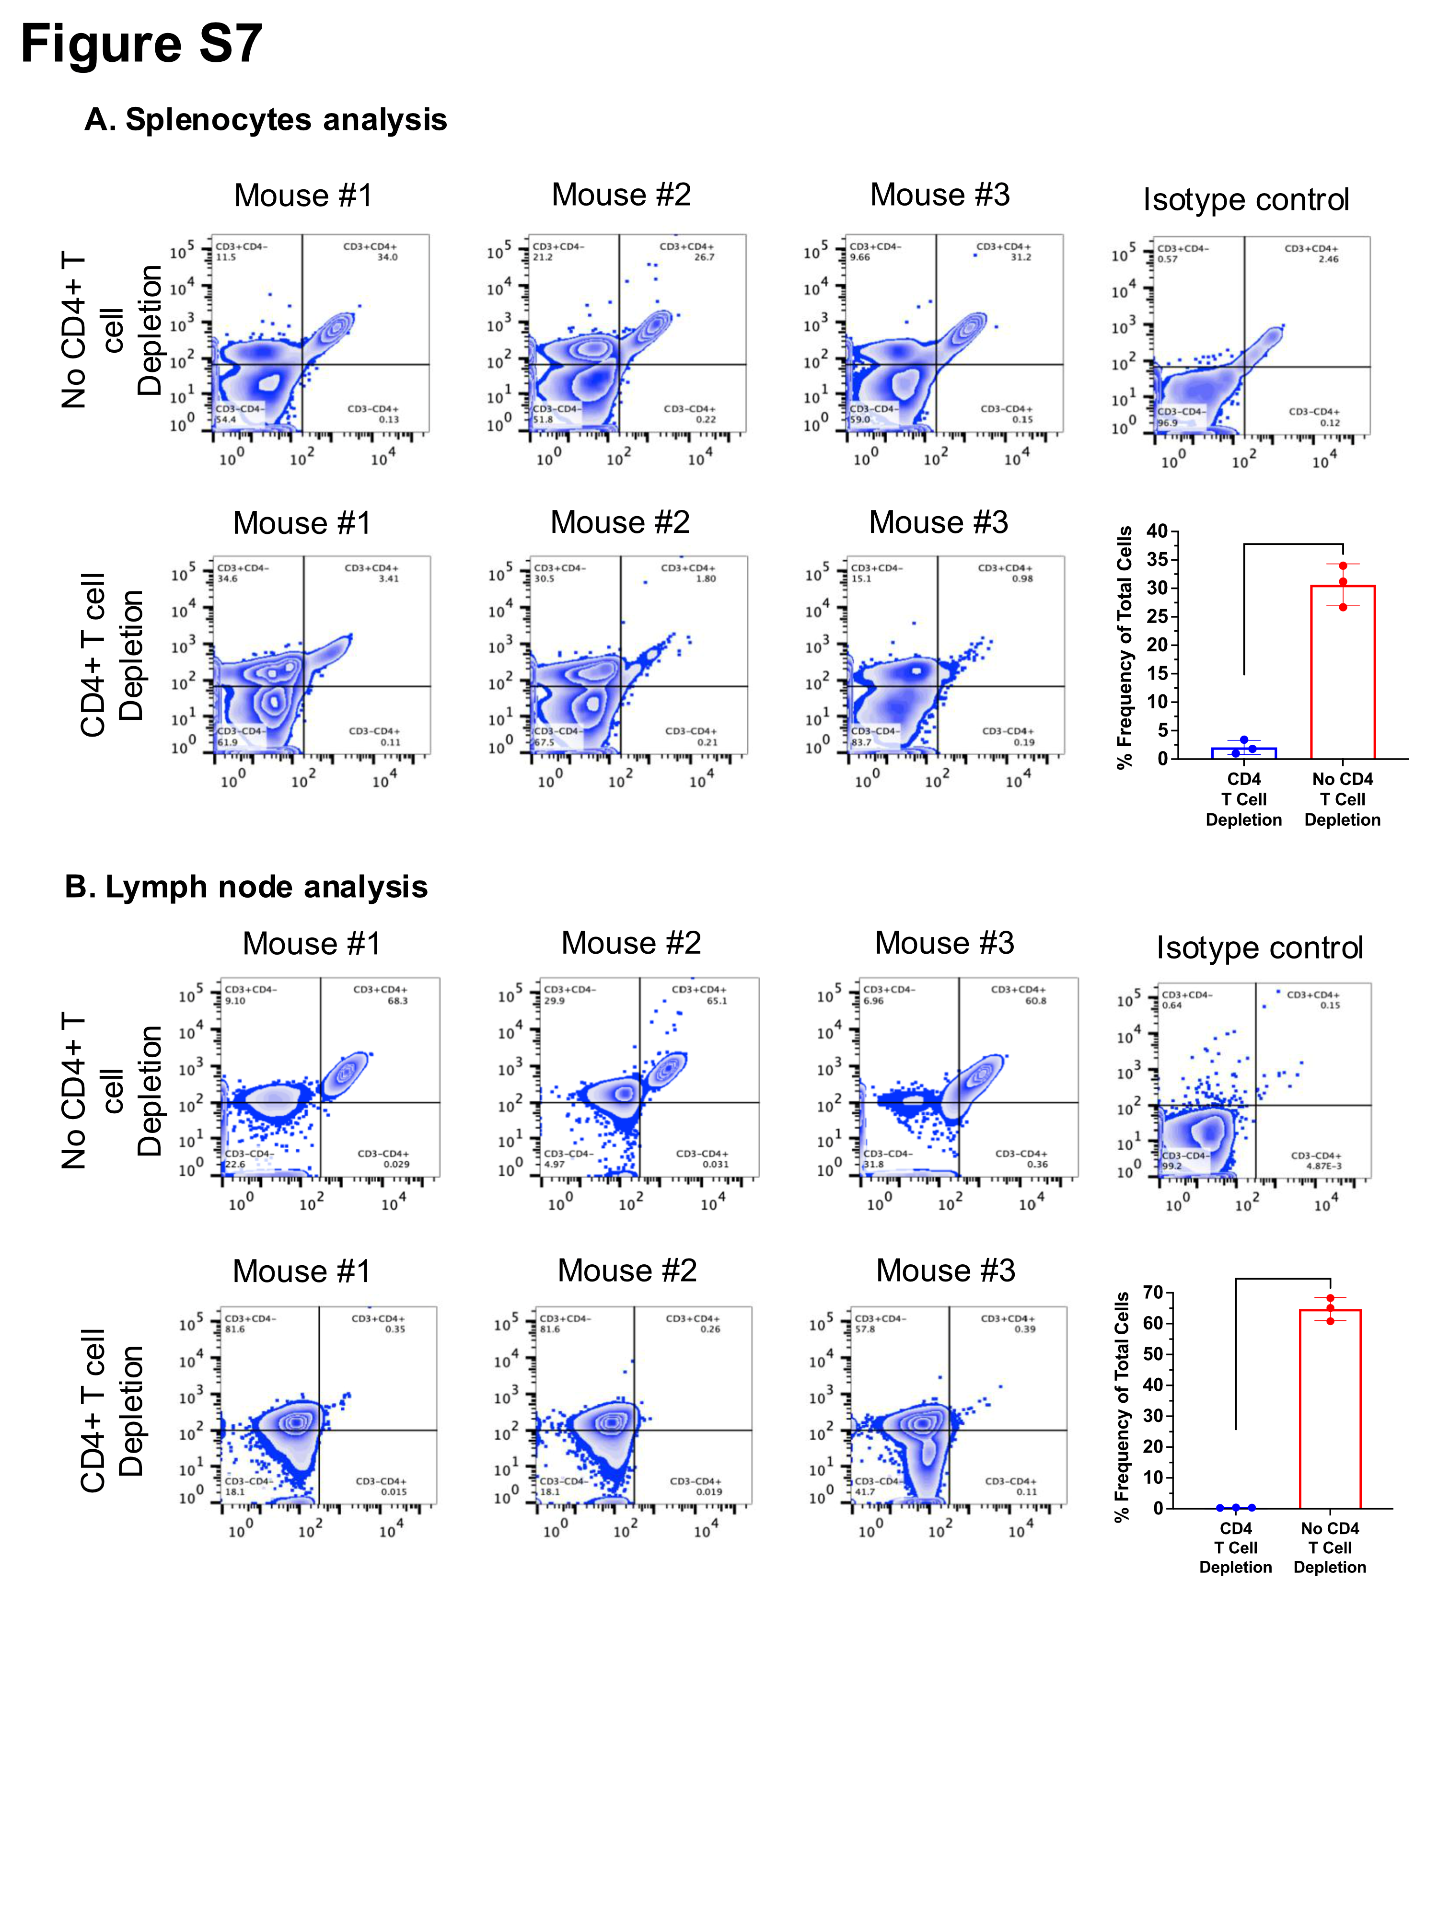
Figure S7. Verification of CD4 T cell depletion.** The vaccinated and infectedmice (n=3/group) from mechanism of infection experiments were treated with anti-CD4 or Isotype-matched as monoclonal antibodies on days -3 and +2 relative to the infection. Mice were euthanized on day +4 for CD4 T cell depletion verification in **(A).** Spleen and (B). Lymph nodes by flow cytometry.

**
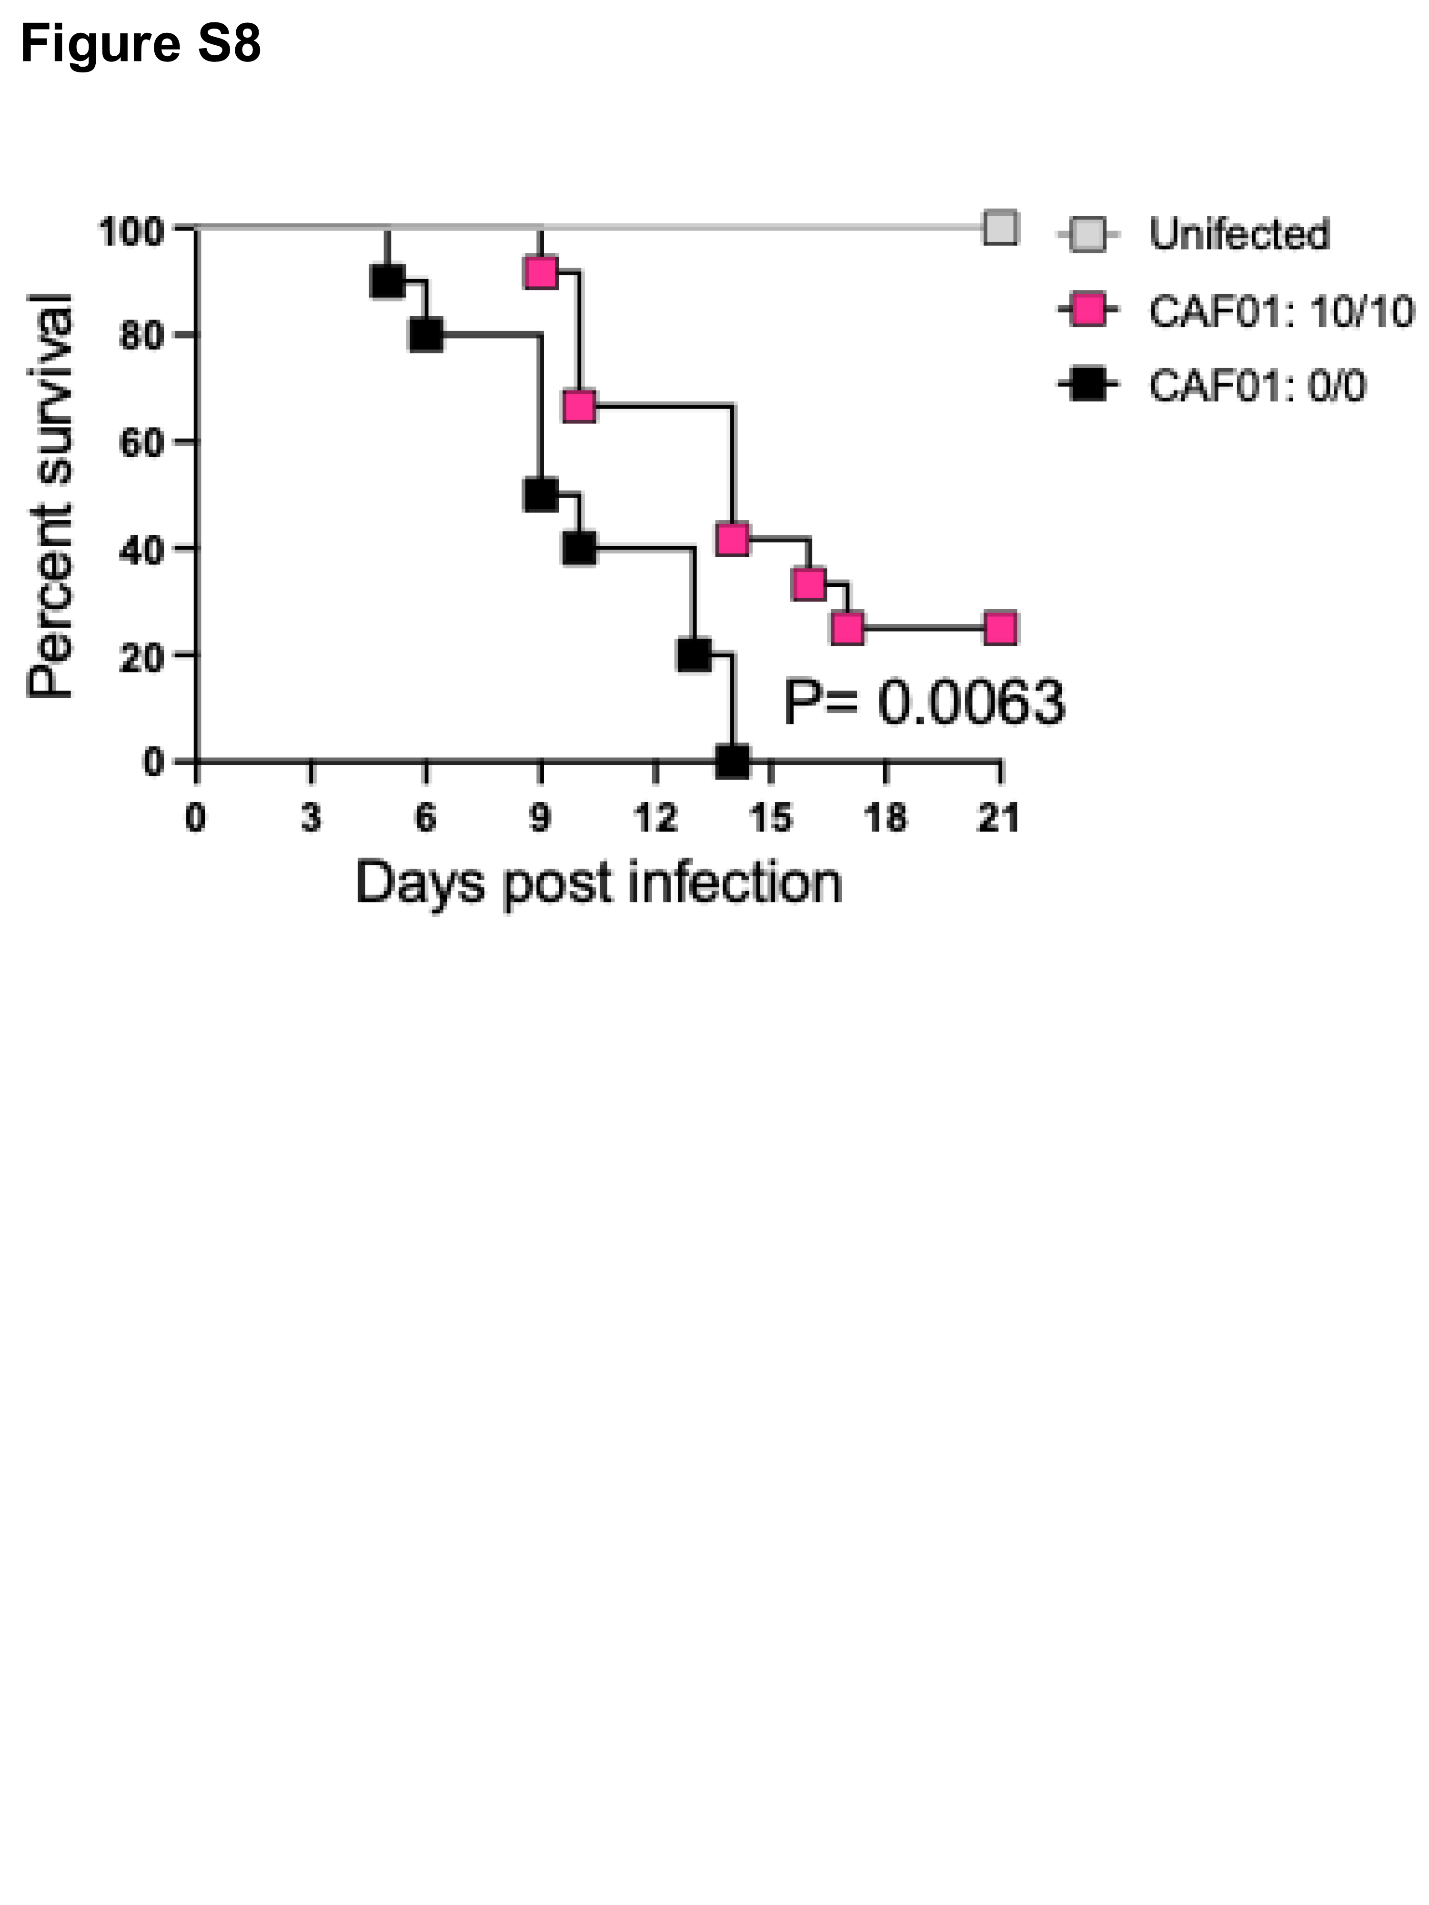
**

**Figure S8. Efficacy of CAF01 vaccine formulation against *C. auris.*** ICR CD-1 mice (N=10 mice/group) were vaccinated two (days 0, 21) times with Als3p/Hyr1p dual antigens at 0µg/0µg or 10µg/10µg dose formulated with CAF01 adjuvant. Three months after the final vaccination, mice were infected intravenously with 5X107 cells/mouse inoculum of *C. auris.* The mice were immunosuppressed on day -2 relative to infection. Survival curves were compared by the Mantel-Cox test, and p<0.5 was considered statistically significant.

**
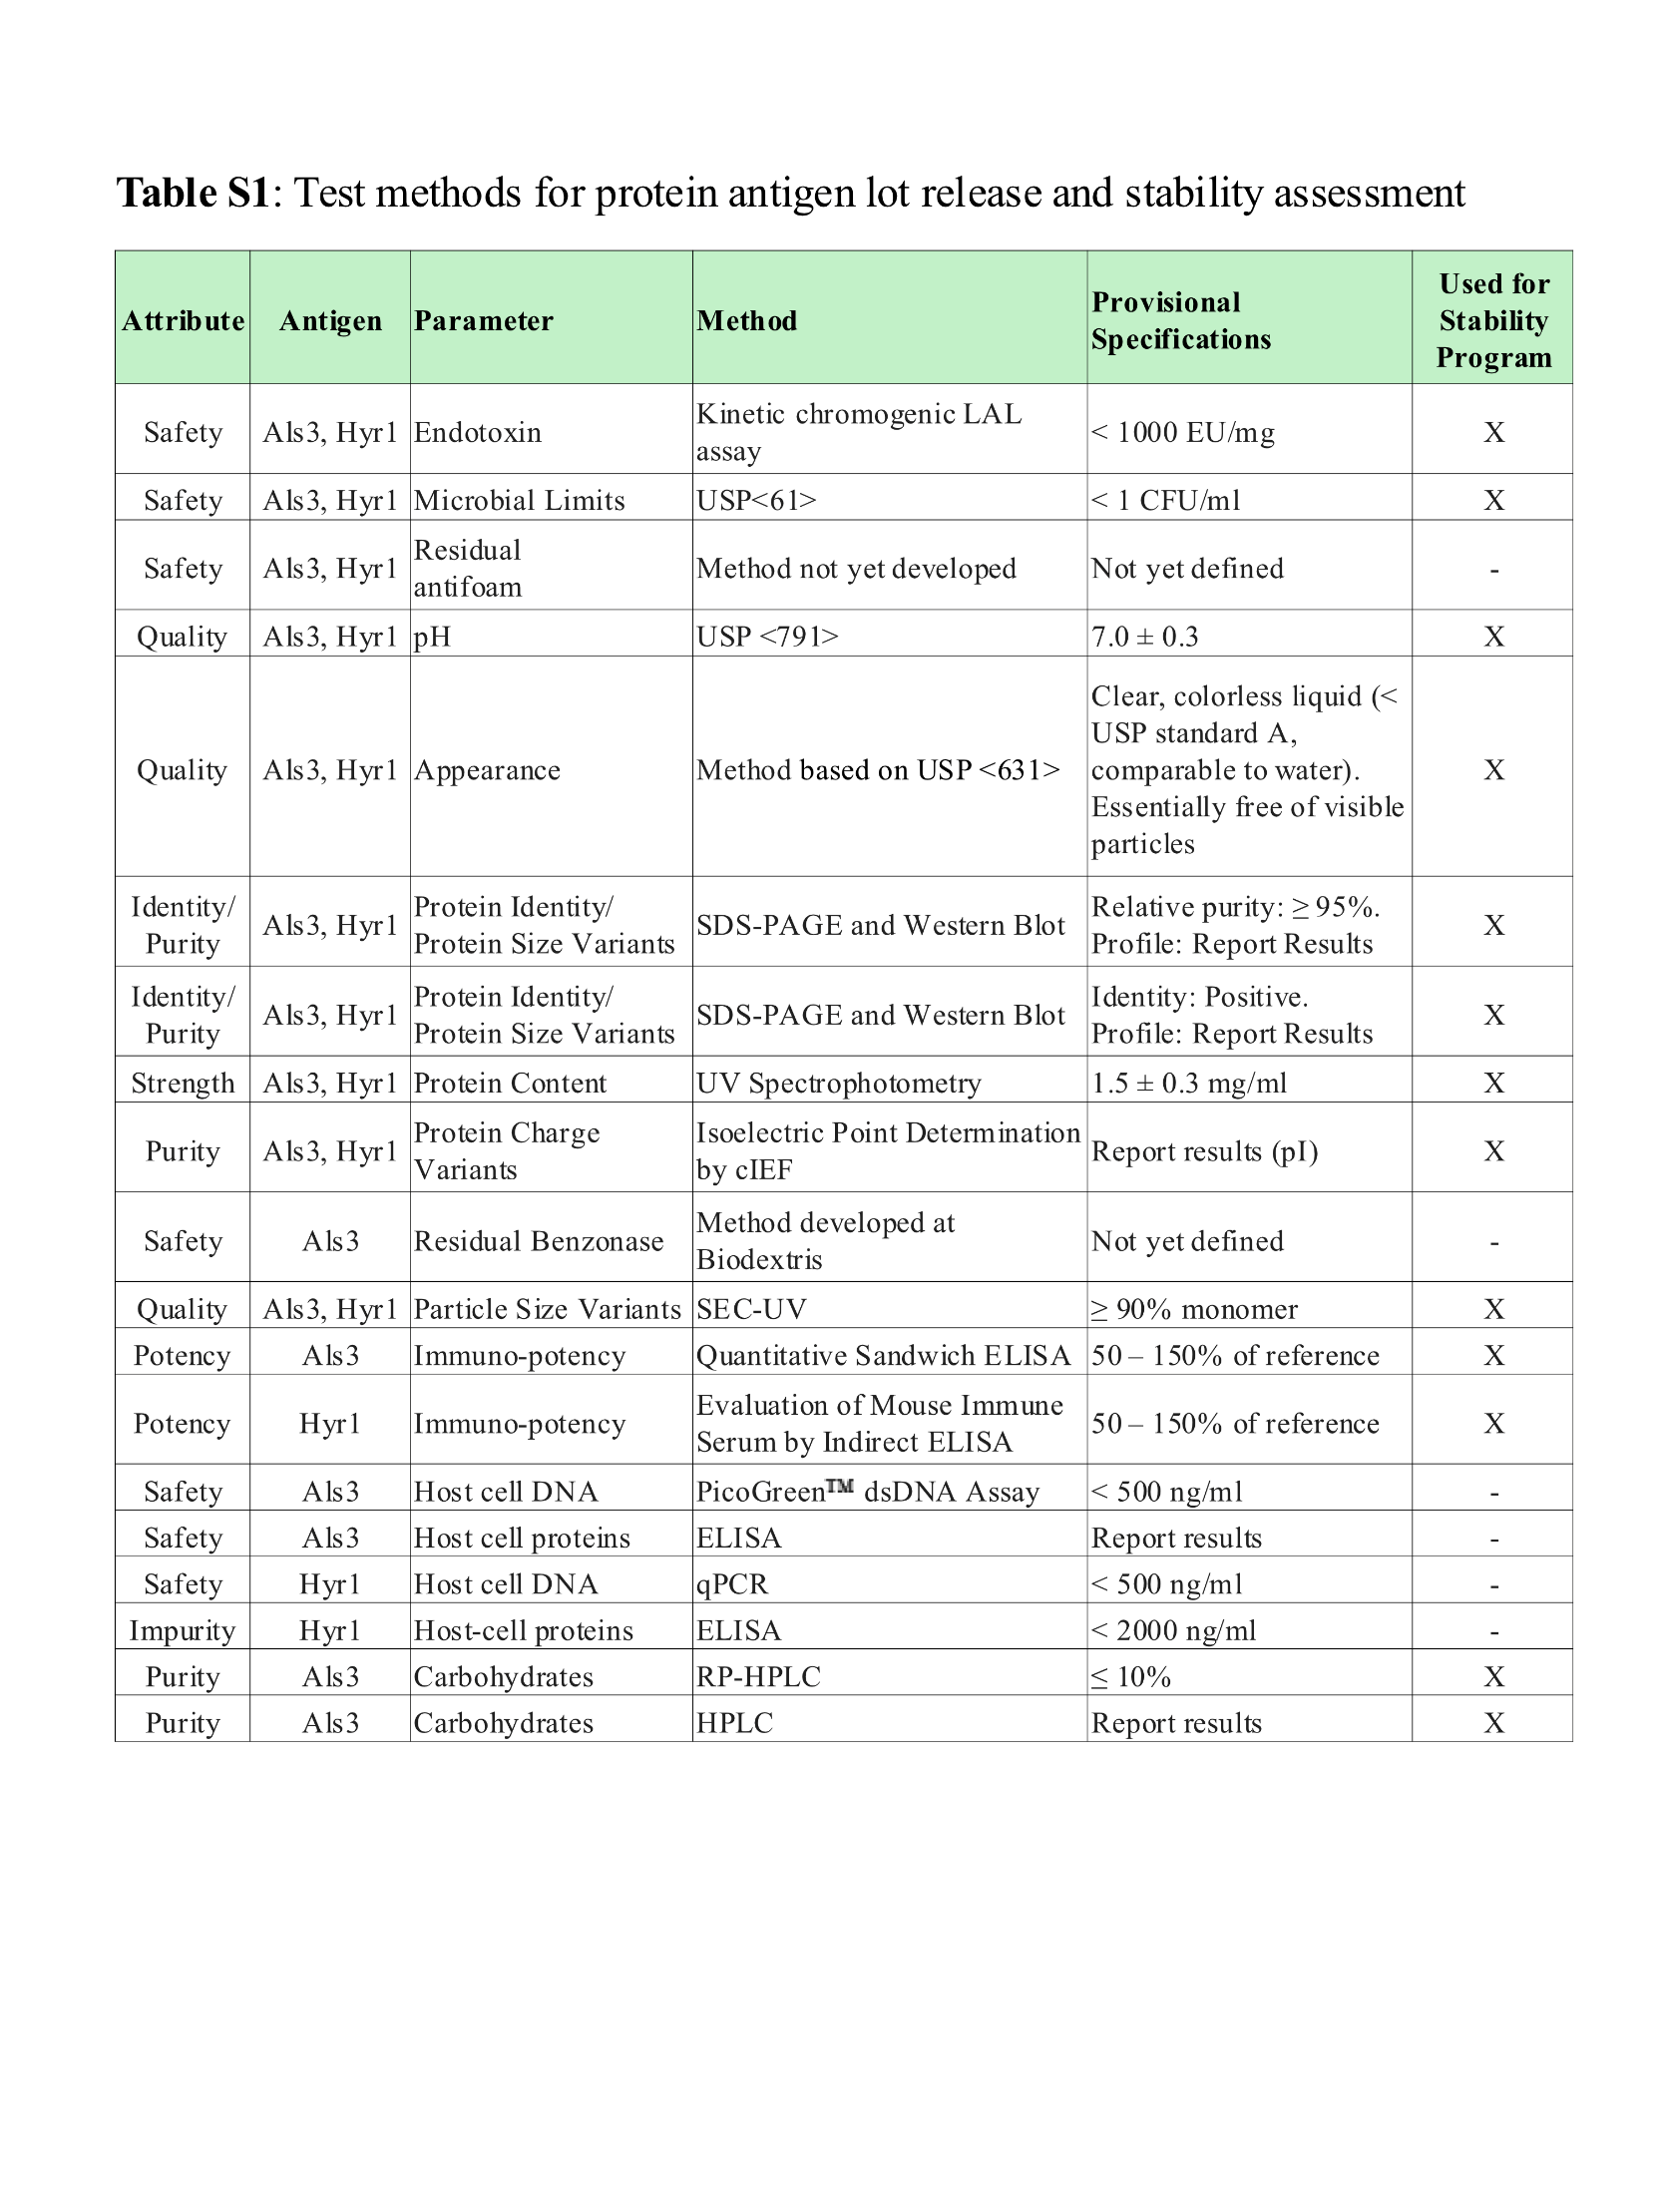
**

**
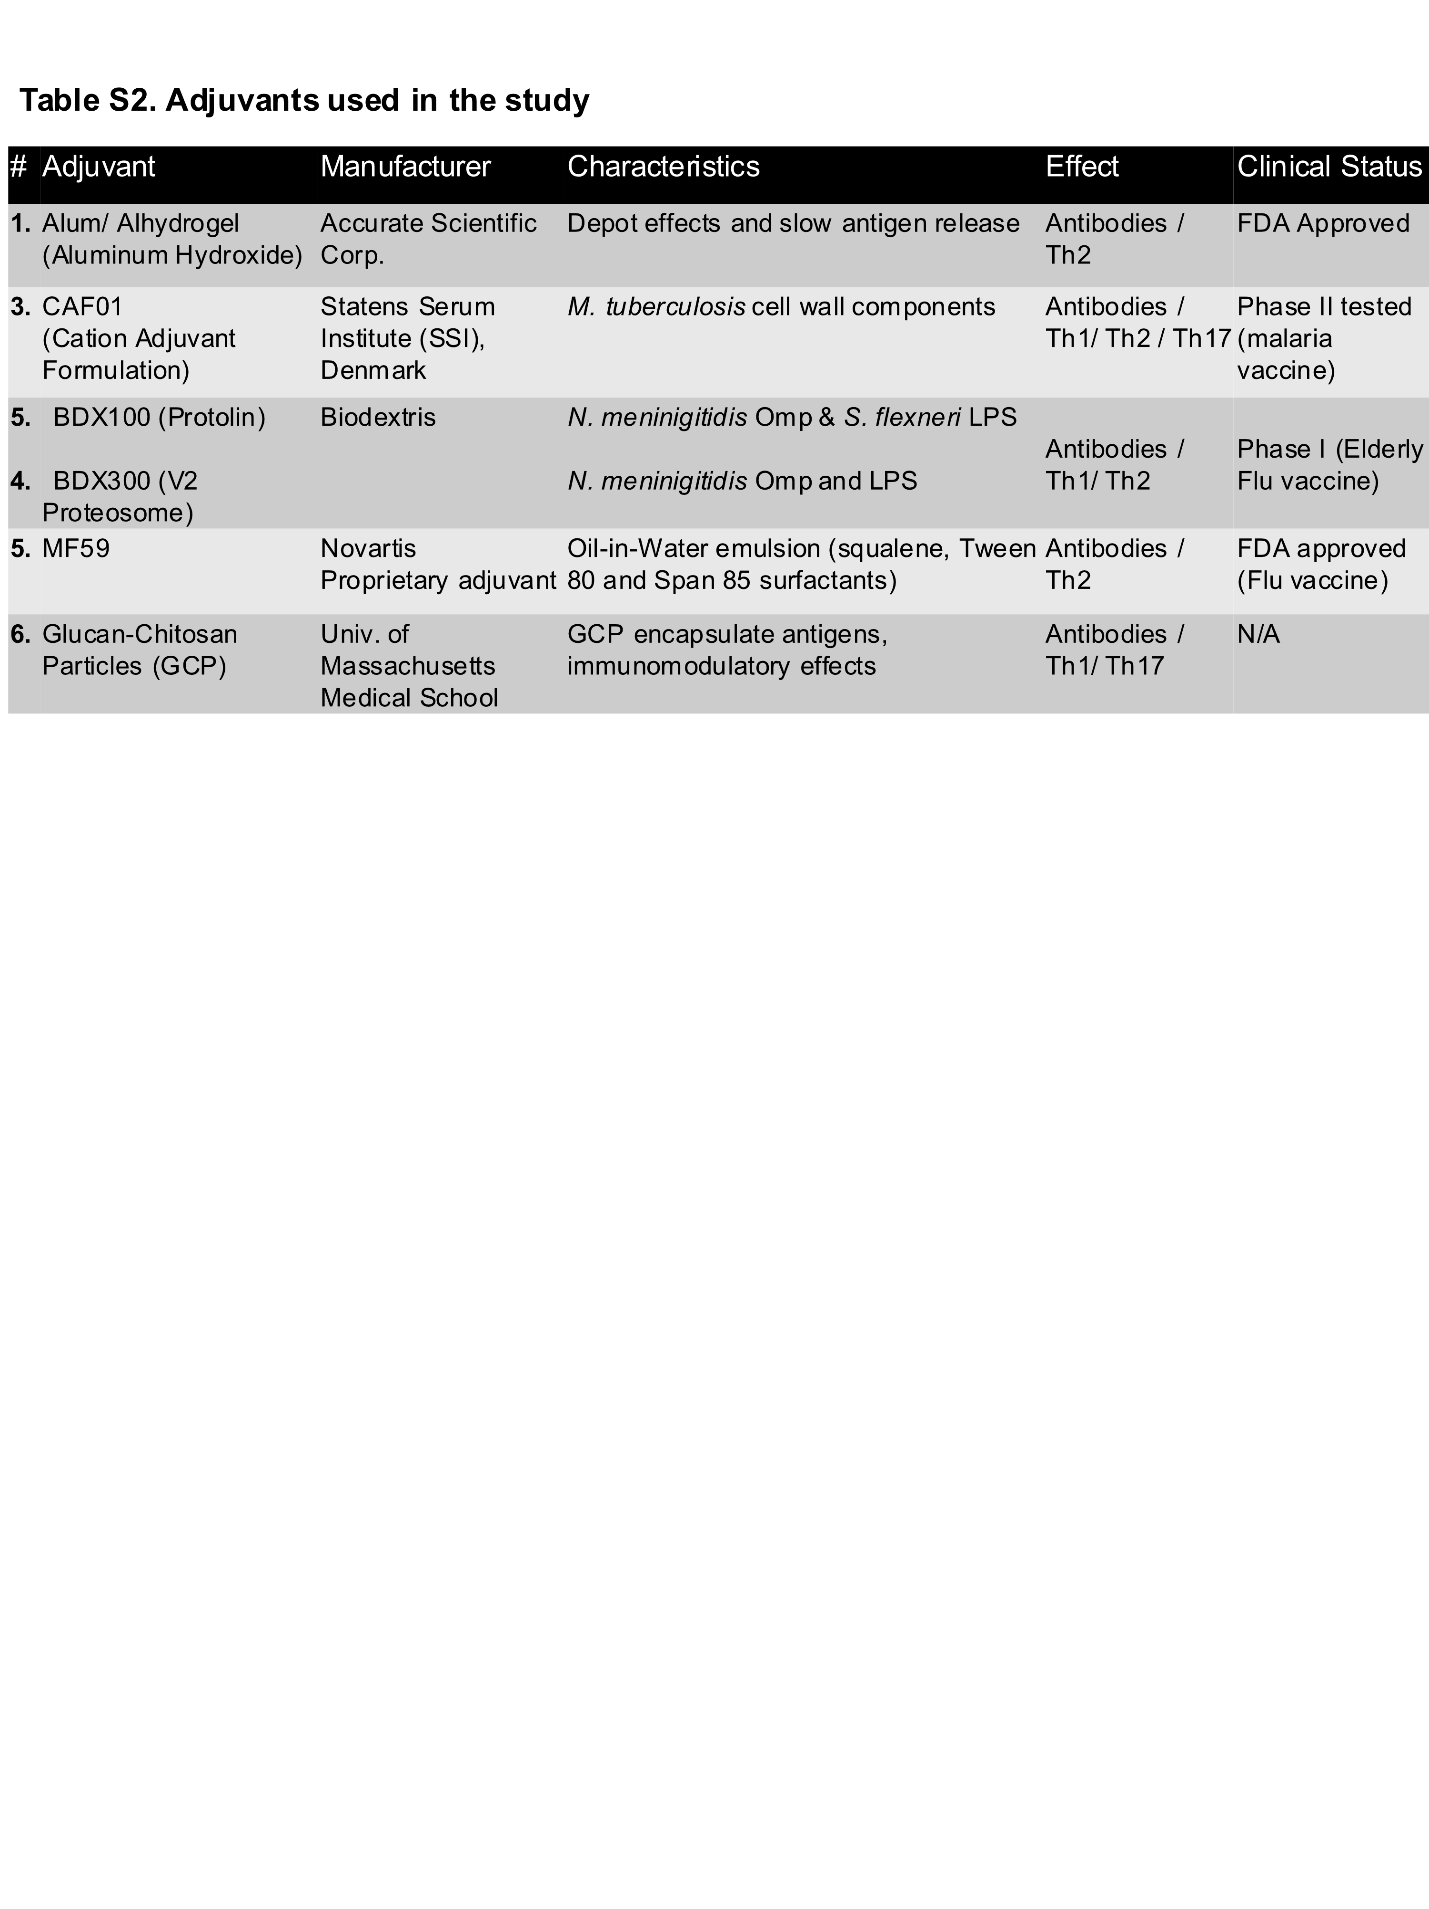
**

**
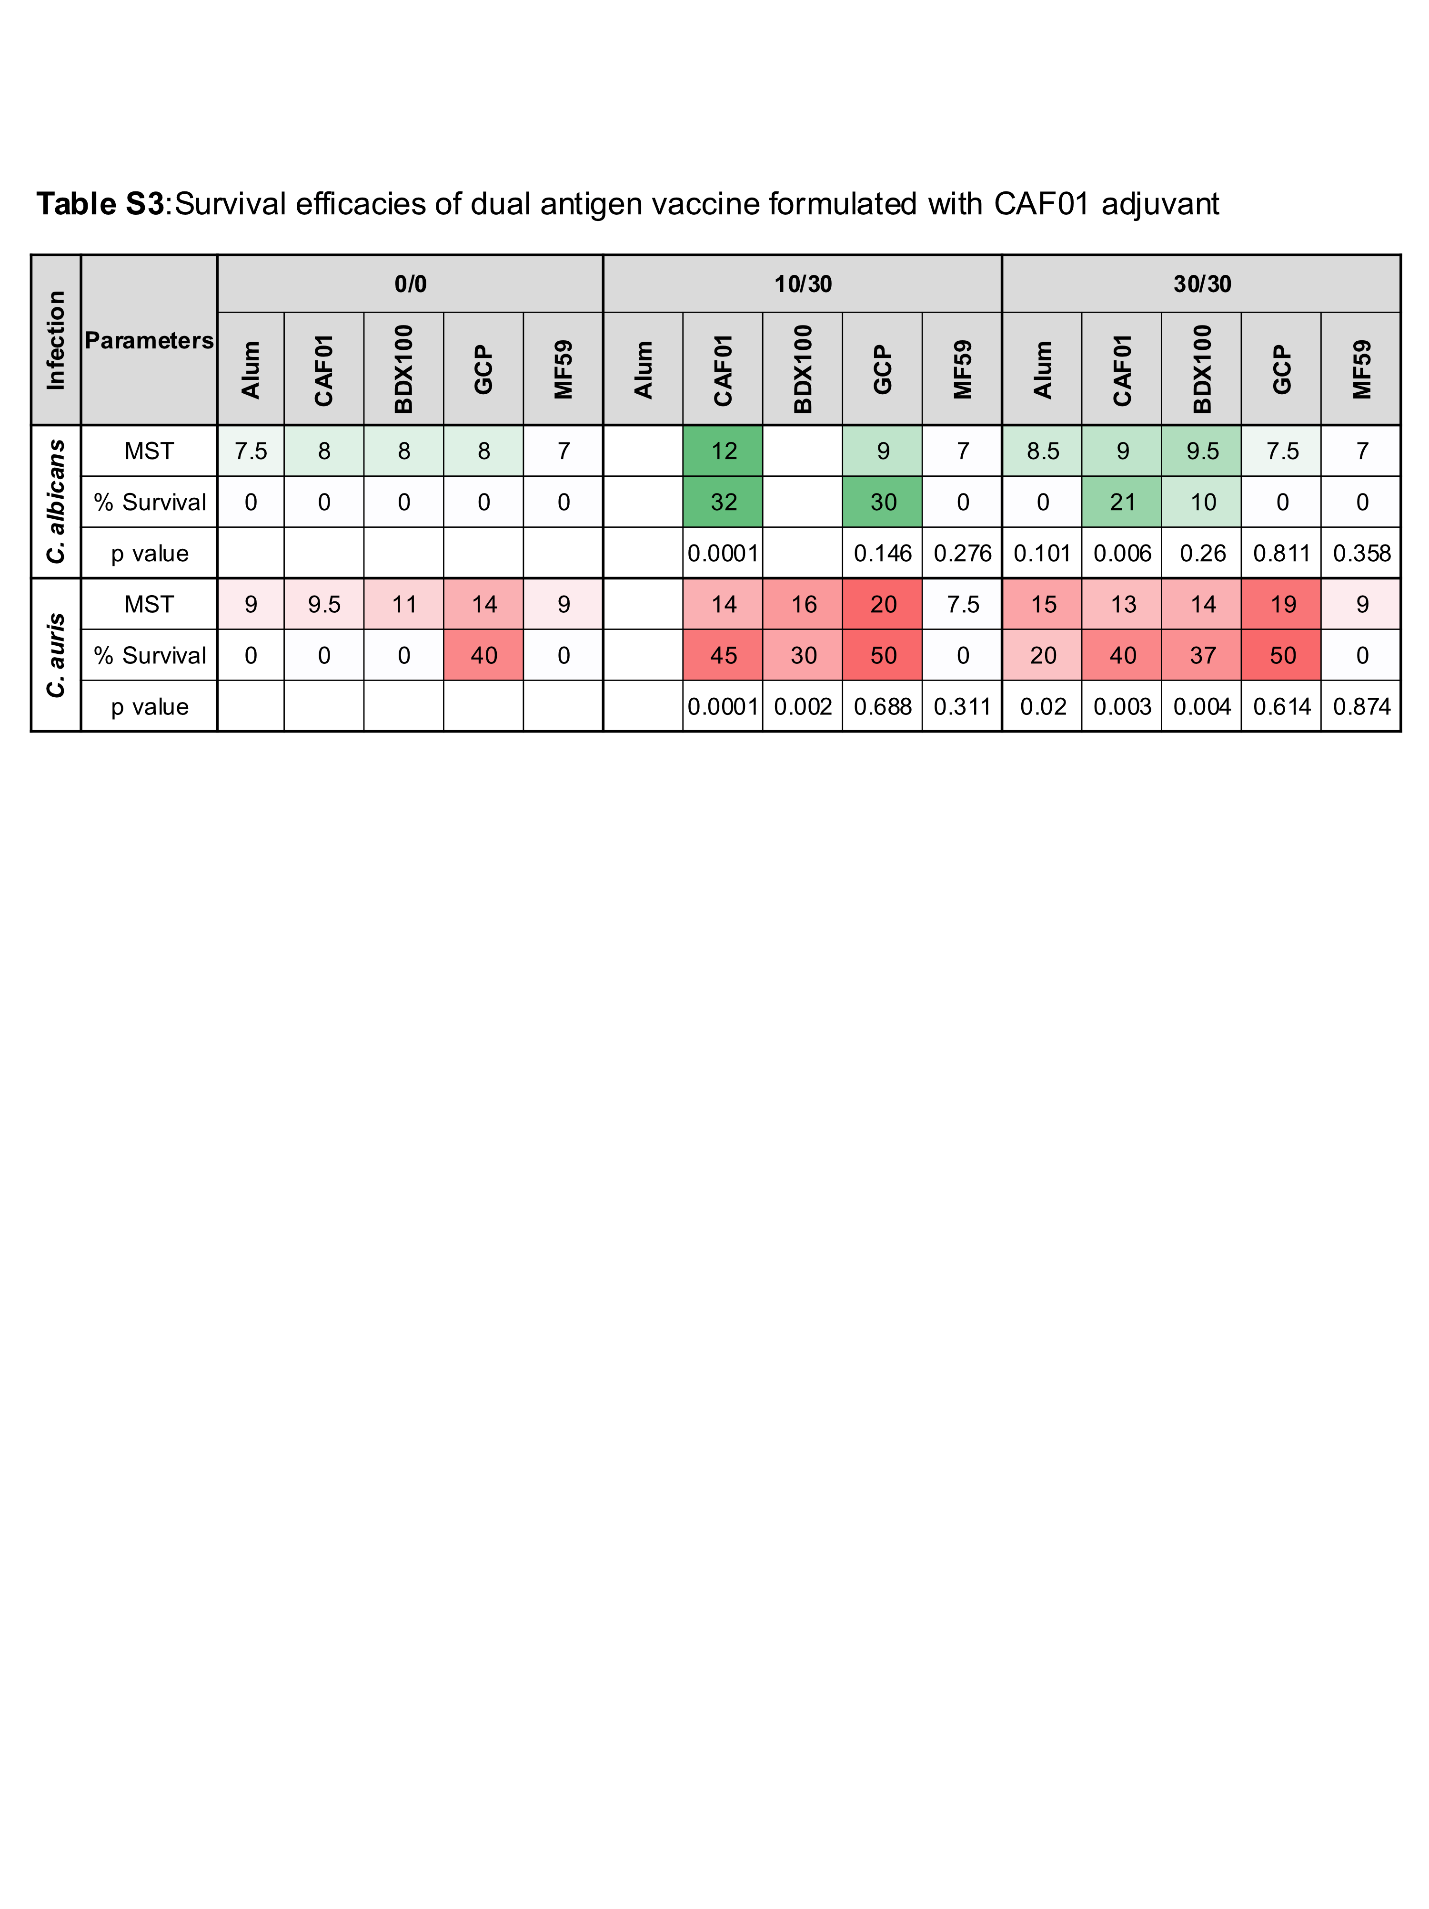
**

**
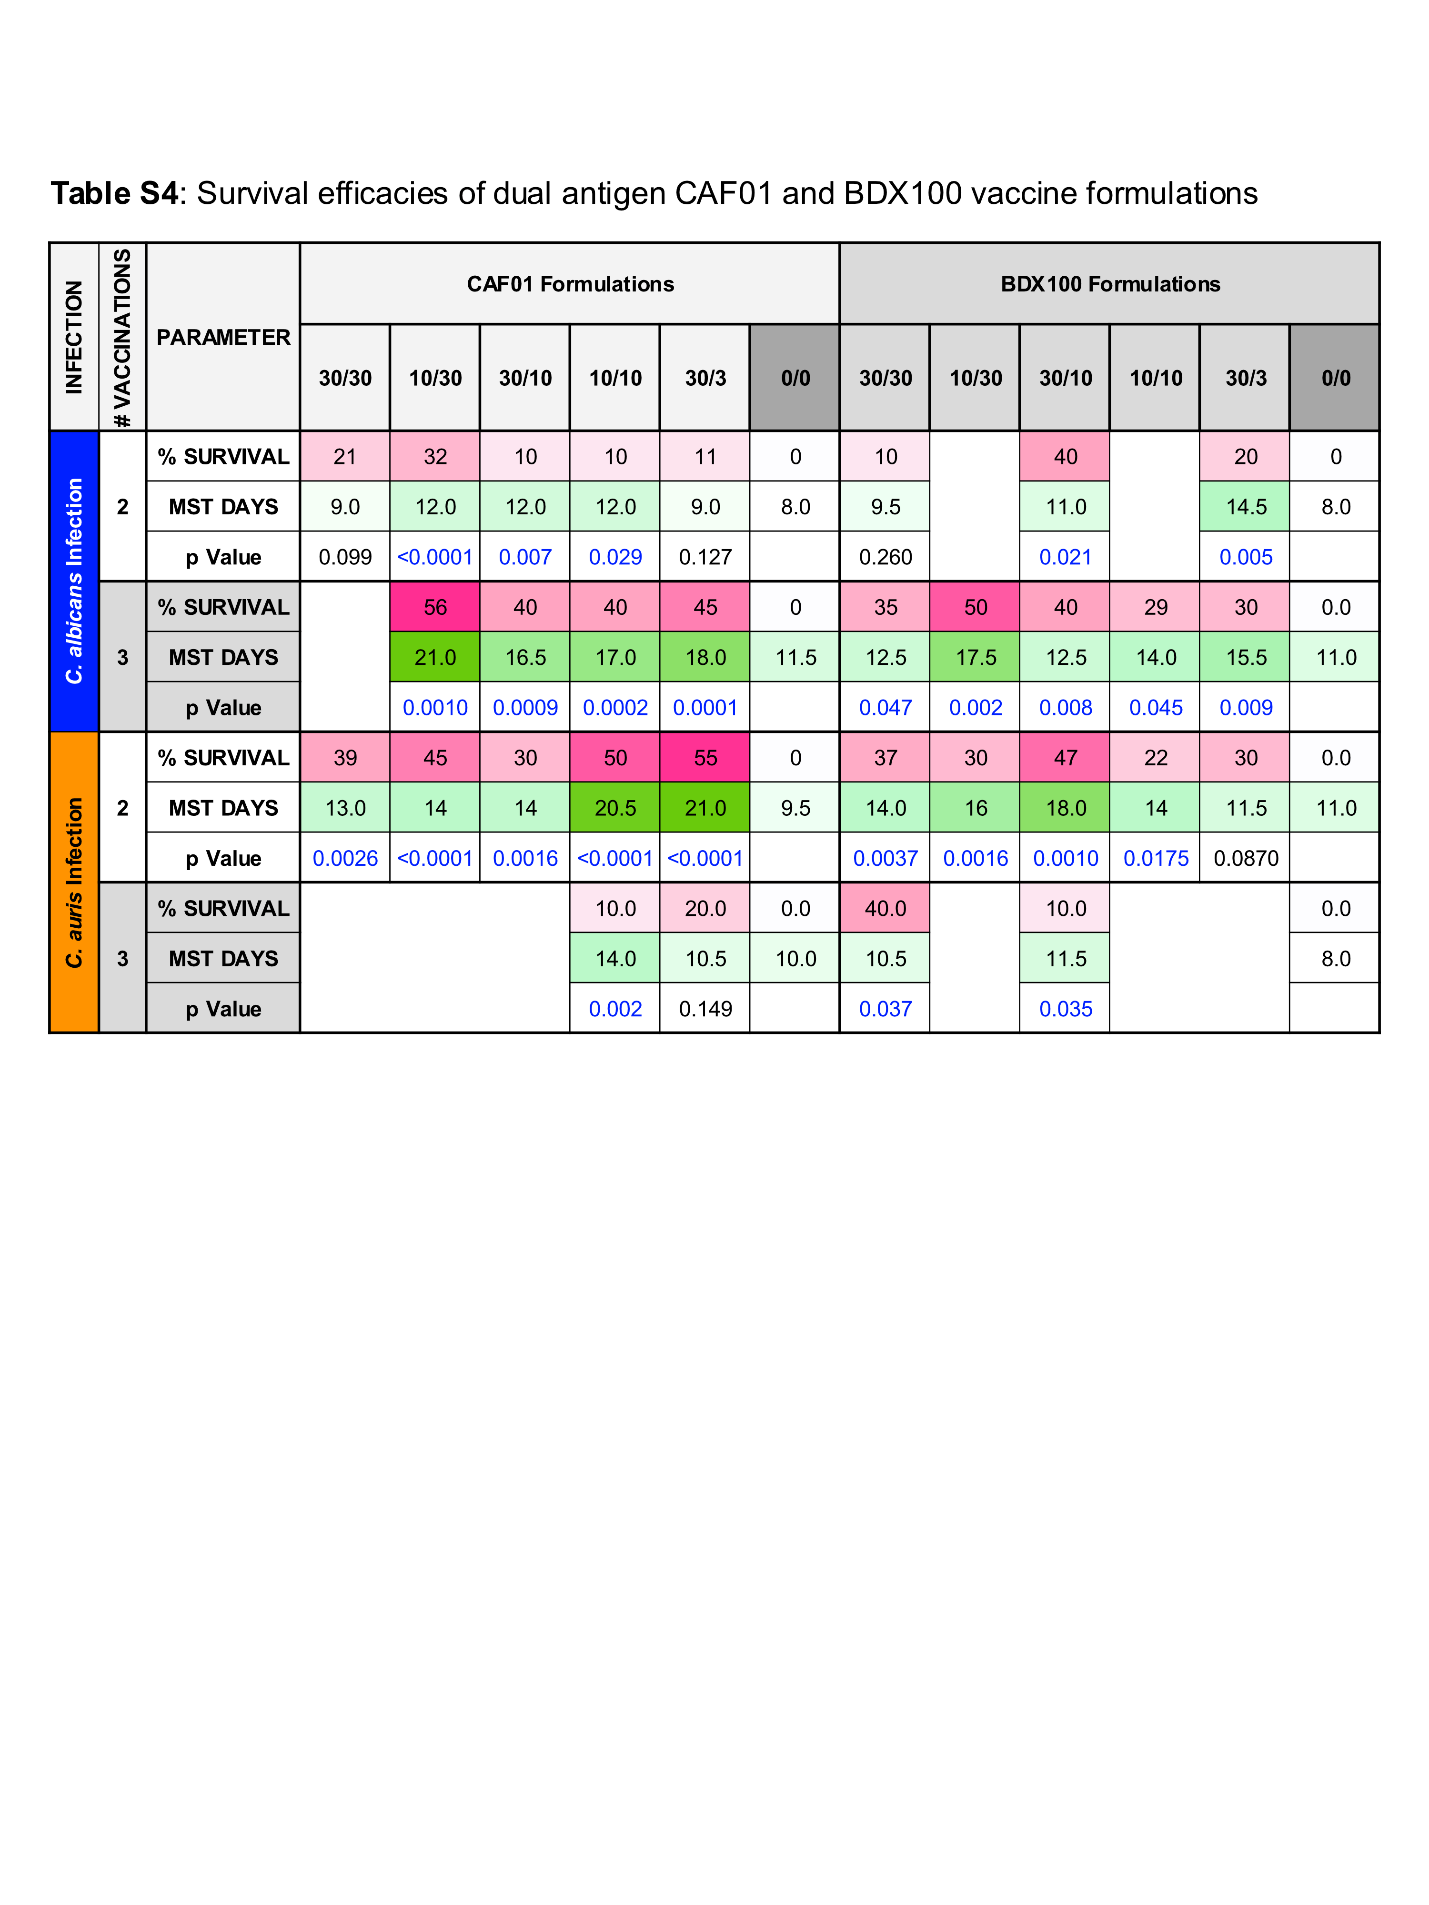
**
